# Supplementary material for: Methylprednisolone and 60 Days in Hospital Survival in Coronavirus Disease 2019 Pneumonia
Source: PubMed Central journal article supplement — Crit Care Explor. 2021 Jul 19;3(7):e0493. doi: 10.1097/CCE.0000000000000493 (PMC8291358; doi:10.1097/cce.0000000000000493), 2021-07-19
Supplement: cc9-3-e0493-s001.pdf [file cc9-3-e0493-s001.pdf]

## **Supplemental Section for**

### **Methylprednisolone and 60 Day Mortality in Hospitalized COVID-19 Pneumonia**

Ronaldo C. Go<sup>1</sup>, Roshan Shah<sup>2</sup>, Themba Nyirenda<sup>3</sup>, Yukiko Oe<sup>4</sup>, Khurram Sarfraz<sup>5</sup>, Justin J. Panthappattu<sup>6</sup>, Lesley Philip<sup>7</sup>, Chandni Bheeman<sup>8</sup>, Neel Shah<sup>9</sup>, Sapan Shah<sup>10</sup>, Sophia Dar<sup>11</sup>, Sung Hong<sup>12</sup>, Waqas Rahman<sup>13</sup>, Hyun Im<sup>14</sup>, Michael Marafelias<sup>15</sup>, Karan Omidvari<sup>16</sup>, Anuja Pradhan<sup>17</sup>, Sean Sadikot<sup>18</sup>, Keith M. Rose<sup>19</sup>, Steven J. Sperber<sup>20</sup>, and Joshua Josephs<sup>21</sup>

## Table of Contents

|                                                                                                                                                                                                                                   |    |
|-----------------------------------------------------------------------------------------------------------------------------------------------------------------------------------------------------------------------------------|----|
| <b>Table S1.</b> Baseline Demographics Disease Characteristics on Unmatched Population and Propensity Score Matched Population .....                                                                                              | 5  |
| <b>Figure S1.</b> Bar plot of COVID-19 Hospitalizations in the 13 HMH Hospitals from March – June 2020.....                                                                                                                       | 6  |
| <b>Figure S2.</b> Spaghetti plot of inpatient COVID-19 patients in 13 HMH Hospitals between March to June 2020.....                                                                                                               | 7  |
| <b>Table S2.</b> Univariate and Multivariate Cox Regression Analyses of Propensity Score Matched Population .....                                                                                                                 | 8  |
| <b>Figure S3.</b> Boxplot of fraction of inspired oxygen (FiO <sub>2</sub> ) reported on COVID-19 patients NMP, LD MP, and HD MP.....                                                                                             | 10 |
| <b>Figure S4.</b> Plot of differences Methylprednisolone – No Methylprednisolone in hospitalized COVID-19 patients. ....                                                                                                          | 11 |
| <b>Figure S5.</b> Comparison Boxplots of distributions of Logit of Propensity Scores for MP– NMP treated COVID-19 patients.....                                                                                                   | 12 |
| <b>Figure S6.</b> Distributions of Logit of Propensity Scores for MP and NMP treated COVID-19 patients.....                                                                                                                       | 13 |
| <b>Figure S7.</b> Kaplan-Meier Plots of In-hospital survival in COVID-19 patients who were not treated with methylprednisolone(N=382) and patients who received methylprednisolone(N=380) during the COVID-19 hospital stay. .... | 14 |
| <b>Figure S8.</b> A plot of log cumulative hazard function (-log (survival function)) by time for MP and NMP treated COVID-19 patients.....                                                                                       | 15 |
| <b>Figure S9.</b> A plot of log cumulative hazard function (-log (survival function)) by log(time) in MP and NMP treated COVID-19 patients.....                                                                                   | 16 |
| <b>Figure S10.</b> Kaplan-Meier Plot of in-hospital survival for no methylprednisolone (NMP), low dose methylprednisolone (LD MP) and high dose methylprednisolone (HD MP) treated cohorts in admitted COVID-19 patients.....     | 17 |
| <b>Figure S11.</b> The plot of log cumulative hazard(-negative survival)) by days for the NMP , LD MP and HD MP treated COVID-19 patients.....                                                                                    | 18 |
| <b>Figure S12.</b> The plot of log cumulative hazard (-negative survival) by log (days) in NMP, LD MP, HD MP treated COVID-19 patients.....                                                                                       | 19 |
| <b>Figure S13.</b> Plot of observed standardized score process of methylprednisolone vs. 20 simulated realizations .....                                                                                                          | 20 |

|                                                                                                                                                                                                                                                        |    |
|--------------------------------------------------------------------------------------------------------------------------------------------------------------------------------------------------------------------------------------------------------|----|
| <b>Figure S14.</b> Plot of observed standardized score process of methylprednisolone (MP) dose level (None, LD, HD) vs. 20 simulated realizations.....                                                                                                 | 21 |
| <b>Figure S15.</b> Plot of observed standardized score process of $FiO_2$ (%) vs. 20 simulated realizations.....                                                                                                                                       | 22 |
| <b>Table S3.</b> Assessment of the Proportional Hazards Assumptions in Baseline Characteristics in COVID-19 Patients.....                                                                                                                              | 23 |
| <b>Table S4.</b> Assessment of the Proportional Hazards Assumptions for the Demographic and comorbidities.....                                                                                                                                         | 24 |
| <b>Table S5.</b> Assessment of the Proportional Hazards Assumptions for the dichotomized lab values and respiratory rate.....                                                                                                                          | 25 |
| <b>Table S6.</b> Assessment of the Proportional Hazards Assumptions for therapy for COVID-19.....                                                                                                                                                      | 26 |
| <b>Table S7.</b> Assessment of the Proportional Hazards Assumptions for clinical presentation parameters.....                                                                                                                                          | 26 |
| <b>Table S8.</b> Assessment of the Proportional Hazards Assumptions for labs (continuous) form.....                                                                                                                                                    | 27 |
| <b>Table S9.</b> Assessment of the Proportional Hazards Assumptions for the inflammatory markers.....                                                                                                                                                  | 28 |
| <b>Table S10.</b> Assessment of the Proportional Hazards Assumptions for the vitals.....                                                                                                                                                               | 29 |
| <b>Table S11.</b> Univariate* Cox Regression Analysis of In-hospital Mortality in COVID-19 Patients.....                                                                                                                                               | 30 |
| <b>Table S12.</b> Multivariable Risk of In-hospital mortality in COVID-19 patients with/without methylprednisolone.....                                                                                                                                | 31 |
| <b>Table S13.</b> Multivariable Risk of In-hospital mortality in COVID-19 patients with HD, LD and No methylprednisolone.....                                                                                                                          | 33 |
| <b>Figure S16.</b> Boxplots of fraction of inspired oxygen ( $FiO_2$ ) reported on admission in COVID-19 patients who were not treated with methylprednisolone and COVID-19 patients who received methylprednisolone.....                              | 34 |
| <b>Figure S17.</b> Boxplots of fraction of inspired oxygen ( $FiO_2$ ) reported on admission in COVID-19 patients who were not treated with methylprednisolone and COVID-19 patients who received LD methylprednisolone and HD methylprednisolone..... | 35 |
| <b>Figure S18.</b> Boxplot of Total Dose/Absolute Body Weight/Day in hospitalized COVID-19 patients who received Methylprednisolone (N=380).....                                                                                                       | 36 |

|                                                                                                                                                                                                                                              |    |
|----------------------------------------------------------------------------------------------------------------------------------------------------------------------------------------------------------------------------------------------|----|
| <b>Figure S19.</b> Boxplot of Total Dose/Absolute Body Weight/Day in hospitalized COVID-19 patients who received LD Methylprednisolone (N=216) and HD Methylprednisolone (N=164).....                                                        | 36 |
| <b>Figure S20.</b> Kaplan-Meier Plot of in-hospital survival for low dose methylprednisolone (LD MP) and high dose methylprednisolone (HD MP) treated cohorts in admitted COVID-19 patients.....                                             | 38 |
| <b>Figure S21.</b> Kaplan-Meier Plot of in-hospital survival for admitted COVID-19 patients whose duration on methylprednisolone (MP) was $\leq 7$ days, between 7 and 14 days and $> 7$ days.....                                           | 39 |
| <b>Figure S22.</b> Kaplan-Meier Plot of in-hospital survival for admitted COVID-19 patients duration since onset of symptoms to initiation of methylprednisolone (MP) dose that was $\leq 7$ days, between 7 and 14 days and $> 7$ days..... | 40 |
| <b>Table S14.</b> Need for Supplemental Oxygen versus Methylprednisolone Dose Duration.....                                                                                                                                                  | 41 |

**Table S1.** Baseline Demographics Disease Characteristics on Unmatched Population and Propensity Score Matched Population.

| Variable                                | Unmatched No methylprednisolone (N=645) | Unmatched Methylprednisolone (N=476) | P Value | Propensity score matched No methylprednisolone (N = 380) | Propensity Score matched Methylprednisolone (N = 379) | P Value       |
|-----------------------------------------|-----------------------------------------|--------------------------------------|---------|----------------------------------------------------------|-------------------------------------------------------|---------------|
| Age in years                            | 64.00(53.00,79.00)                      | 64.00(56.00,73.00)                   | 0.6620  | 65.00(54.00,80.00)                                       | 64.00(55.00,74.00)                                    | 0.1129        |
| Male                                    | 411(63.43)                              | 219(53.03)                           | 0.6079  | 238(62.14)                                               | 244 (64.21)                                           | 0.5175        |
| Weight (kg)                             | 81.20(68.70,90.72)                      | 83.90(71.10,99.80)                   | 0.0040  | 81.67(70.30,95.85)                                       | 83.90(71.45,99.80)                                    | 0.4270        |
| BMI (kg/m <sup>2</sup> )                | 28.18(24.83,31.65)                      | 29.48(25.94,34.30)                   | <.0001  | 29.82(25.51,32.80)                                       | 29.69(25.82,34.31)                                    | 0.1912        |
| White                                   | 336(51.85)                              | 154(23.77)                           | 0.6079  | 198(51.70)                                               | 193(52.30)                                            | 0.5085        |
| Asian                                   | 45(6.94)                                | 31(7.51)                             | 0.6079  | 20(5.22)                                                 | 28(7.59)                                              | 0.5085        |
| Black                                   | 91(14.04)                               | 47(11.38)                            | 0.6079  | 57(14.88)                                                | 42(11.38)                                             | 0.5085        |
| Other                                   | 154(23.77)                              | 229(54.01)                           | 0.6079  | 94(24.54)                                                | 96(26.02)                                             | 0.5085        |
| Community                               | 527(81.33)                              | 250(58.96)                           | <.0001  | 309(80.68)                                               | 220(7.89)                                             | <.0001        |
| Academic                                | 121(18.67)                              | 174(41.04)                           | <.0001  | 74(19.32)                                                | 160(42.11)                                            | <.0001        |
| Nursing Home                            | 125(19.38)                              | 43(10.26)                            | <.0001  | 308(80.42)                                               | 340(89.95)                                            | <b>0.0002</b> |
| Former/Current smoker                   | 116(19.86)                              | 96(25.81)                            | 0.0377  | 77(21.57)                                                | 88(25.81)                                             | 0.2334        |
| Never smoker                            | 468(80.14)                              | 276(74.19)                           | 0.0377  | 280(78.43)                                               | 253(74.19)                                            | 0.2334        |
| SOB                                     | 412(63.78)                              | 334(78.96)                           | <.0001  | 249(65.01)                                               | 298(78.63)                                            | <.0001        |
| Cough                                   | 417(64.75)                              | 301(71.16)                           | 0.0327  | 244(63.87)                                               | 271(71.32)                                            | <b>0.0303</b> |
| AMS                                     | 109(17.33)                              | 46(11.11)                            | 0.0058  | 63(16.45)                                                | 41(10.79)                                             | <b>0.0032</b> |
| GI                                      | 149(23.17)                              | 88(20.90)                            | 0.4077  | 76(19.90)                                                | 81(21.37)                                             | 0.6545        |
| Anosmia or Ageusia                      | 10(1.57)                                | 9(2.20)                              | 0.4834  | 6(1.58)                                                  | 9(2.44)                                               | 0.4445        |
| Duration of Symptoms prior to admission | 5.00(2.00,7.00)                         | 5.00(3.00,7.00)                      | 0.0165  | 5.00(2.00,7.00)                                          | 5.00(3.00,7.00)                                       | 0.0523        |
| Diabetes                                | 214(33.18)                              | 157(37.20)                           | 0.1888  | 144(37.60)                                               | 139(36.58)                                            | 0.8221        |
| COPD                                    | 27(4.19)                                | 30(7.09)                             | 0.0506  | 20(5.22)                                                 | 28(7.37)                                              | 0.2360        |
| Asthma                                  | 40(6.22)                                | 40(9.48)                             | 0.0569  | 24(6.27)                                                 | 37(9.76)                                              | 0.0832        |
| Cancer                                  | 61(9.46)                                | 49(11.61)                            | 0.2594  | 43(11.23)                                                | 43(11.32)                                             | 1.0000        |
| CAD                                     | 86(13.33)                               | 67(15.84)                            | 0.2839  | 50(13.05)                                                | 61(16.05)                                             | 0.2594        |
| CVA                                     | 28(4.35)                                | 15(3.55)                             | 0.6336  | 18(4.71)                                                 | 14(3.68)                                              | 0.5887        |
| CHF                                     | 51(7.96)                                | 32(7.57)                             | 0.9071  | 18(4.71)                                                 | 28(7.37)                                              | 1.0000        |
| Arrhythmia                              | 65(10.12)                               | 38(8.96)                             | 0.5967  | 41(10.73)                                                | 30(7.89)                                              | 0.2126        |
| Renal Failure                           | 40(6.23)                                | 33(7.78)                             | 0.3249  | 28(7.31)                                                 | 31(8.16)                                              | 0.6862        |
| Rheumatologic Disease                   | 15(2.33)                                | 22(5.20)                             | 0.0159  | 10(2.61)                                                 | 19(5.01)                                              | 0.0909        |
| qSOFA 0                                 | 375(59.62)                              | 225(54.35)                           | 0.2544  | 224(58.49)                                               | 222(58.42)                                            | 0.7647        |
| qSOFA 1                                 | 199(31.64)                              | 156(37.68)                           | 0.2544  | 130(33.94)                                               | 130(34.21)                                            | 0.7647        |
| qSOFA 2                                 | 51(8.11)                                | 31(7.49)                             | 0.2544  | 28(7.31)                                                 | 26(6.84)                                              | 0.7647        |
| qSOFA 3                                 | 4(0.64)                                 | 2(0.48)                              | 0.2544  | 1(0.26)                                                  | 2(0.53)                                               | 0.7647        |
| O2 sat < 94%                            | 305(48.41)                              | 225(57.25)                           | 0.0069  | 216(56.40)                                               | 218(57.37)                                            | 0.8265        |
| Temperature                             | 99.00(98.00,100.70)                     | 99.30(98.00,100.80)                  | 0.0476  | 98.80(97.70,100.40)                                      | 99.25(98.00,100.65)                                   | <b>0.0027</b> |
| Heart Rate                              | 95.00(82.00,108.00)                     | 95.00(82.00,108.00)                  | 0.0581  | 95.00(84.00,108.00)                                      | 97.00(86.00,108.00)                                   | 0.2467        |
| Respiratory Rate                        | 19.00(18.00,21.00)                      | 20.00(18.00,22.00)                   | 0.0097  | 19.00(18.00,22.00)                                       | 20.00(18.00,22.00)                                    | 0.2622        |
| Nasal Cannula                           | 227(82.85)                              | 137(66.50)                           | 0.0005  | 161(82.14)                                               | 132(66.00)                                            | <b>0.0045</b> |
| Venti mask                              | 4(1.46)                                 | 3(1.46)                              | 0.0005  | 2(1.02)                                                  | 3(1.50)                                               | <b>0.0045</b> |
| High Flow                               | 8(2.92)                                 | 15(7.28)                             | 0.0005  | 6(3.06)                                                  | 15(7.50)                                              | <b>0.0045</b> |
| CPAP                                    | 1(0.36)                                 | 2(0.97)                              | 0.0005  | 1(0.51)                                                  | 2(1.00)                                               | <b>0.0045</b> |
| BPAP                                    | 0(0.00)                                 | 2(0.97)                              | 0.0005  | 0(0.00)                                                  | 2(1.00)                                               | <b>0.0045</b> |
| Mechanical Ventilation                  | 55(10.62)                               | 138(39.88)                           | <.0001  | 35(11.08)                                                | 129(39.09)                                            | <.0001        |
| WBC                                     | 6.50(5.00,9.10)                         | 6.50(5.10,9.50)                      | 0.5947  | 6.60(5.10,9.20)                                          | 6.50(5.10,9.55)                                       | 0.8365        |
| HGB                                     | 13.40(12.00,14.50)                      | 13.50(12.20,14.80)                   | 0.2190  | 13.40(12.20,14.50)                                       | 13.50(12.20,14.70)                                    | 0.5022        |
| PLT                                     | 200.00(158.00,251.00)                   | 186.00(147.00,251.00)                | 0.0596  | 203.00(161.00,259.00)                                    | 189.50(147.00,252.00)                                 | <b>0.0238</b> |

|                     |                        |                        |        |                        |                        |                  |
|---------------------|------------------------|------------------------|--------|------------------------|------------------------|------------------|
| ALC                 | 0.90(0.60,1.20)        | 0.79(0.60,1.10)        | 0.0007 | 0.90(0.60,1.30)        | 0.80(0.60,1.10)        | <b>0.0004</b>    |
| IL6                 | 11.50(5.00,34.00)      | 12.00(5.00,32.00)      | 0.6607 | 12.50(5.00,37.50)      | 12.00(5.00,31.50)      | 0.8044           |
| CRP                 | 10.91(5.20,20.79)      | 13.11(7.09,20.20)      | 0.0444 | 11.71(5.34,22.10)      | 13.40(7.10,20.34)      | 0.3187           |
| D-Dimer             | 1.01(0.64,2.11)        | 0.98(0.61,1.89)        | 0.7909 | 1.01(0.65,2.07)        | 0.98(0.61,1.91)        | 0.8118           |
| Ferritin            | 641.89(320.65,1453.60) | 838.96(430.40,1569.80) | 0.0044 | 727.45(331.61,1470.50) | 853.21(444.90,1569.80) | <b>0.0231</b>    |
| Creatinine          | 1.00(0.80,1.40)        | 1.01(0.80,1.33)        | 0.9379 | 1.01(0.80,1.49)        | 1.01(0.80,1.35)        | 0.2327           |
| Troponin            | 0.03(0.01,0.30)        | 0.02(0.01,0.09)        | 0.0516 | 0.03(0.01,0.30)        | 0.02(0.01,0.09)        | 0.1355           |
| BNP                 | 103.70(29.85,701.30)   | 88.80(26.20,362.00)    | 0.1702 | 129.70(40.60,941.10)   | 85.25(25.60,339.35)    | <b>0.0141</b>    |
| Hydroxychloroquine  | 463(73.73)             | 333(88.33)             | <.0001 | 270(71.81)             | 318(88.58)             | <b>&lt;.0001</b> |
| Azithromycin        | 438(70.19)             | 277(73.47)             | 0.2793 | 256(68.45)             | 264(73.33)             | 0.1672           |
| Remdesivir          | 4(0.65)                | 63(16.80)              | 0.0061 | 3(0.81)                | 10(2.81)               | 0.0512           |
| Tocilizumab         | 31(5.01)               | 11(2.94)               | <.0001 | 14(3.78)               | 64(17.88)              | <b>&lt;.0001</b> |
| Convalescent Plasma | 0(0.00)                | 4(28.57)               | 0.0002 | 0(0.00)                | 4(28.57)               | <b>0.0015</b>    |
| ECMO                | 1(0.17)                | 9(2.43)                | 0.0011 | 1(0.28)                | 9(2.54)                | <b>0.0104</b>    |
| Dialysis            | 19(3.09)               | 11(2.92)               | 0.8748 | 14(3.78)               | 11(3.04)               | 0.6853           |

HR = Hazard Ratio; CI = Confidence Interval; SOB = Shortness of Breath; AMS = Altered Mental Status; GI = Gastrointestinal Symptoms; PTA = Prior to admission; COPD = Chronic Obstructive Disease; CAD = Coronary Artery Disease; CVA = Cerebrovascular Accident; CHF = Congestive Heart Failure; LFTs = elevated liver function tests; qSOFA = Quick Sepsis Related Organ Failure Assessment; HCQ = Hydroxychloroquine; AZ = Azithromycin; MP = Methylprednisolone; HD MP = High Dose Methylprednisolone; LD MP = Low Dose Methylprednisolone; WBC= White Blood Cells; HGB = Hemoglobin; PLT = Platelet; ALC = Absolute Lymphocyte Count; ECMO = Extracorporeal Membrane Oxygenation

**Figure S1.** Bar plot of COVID-19 Hospitalizations in the 13 HMH Hospitals from March – June 2020. Hackensack University Medical Center (HUM) has 4 hospitals combined.

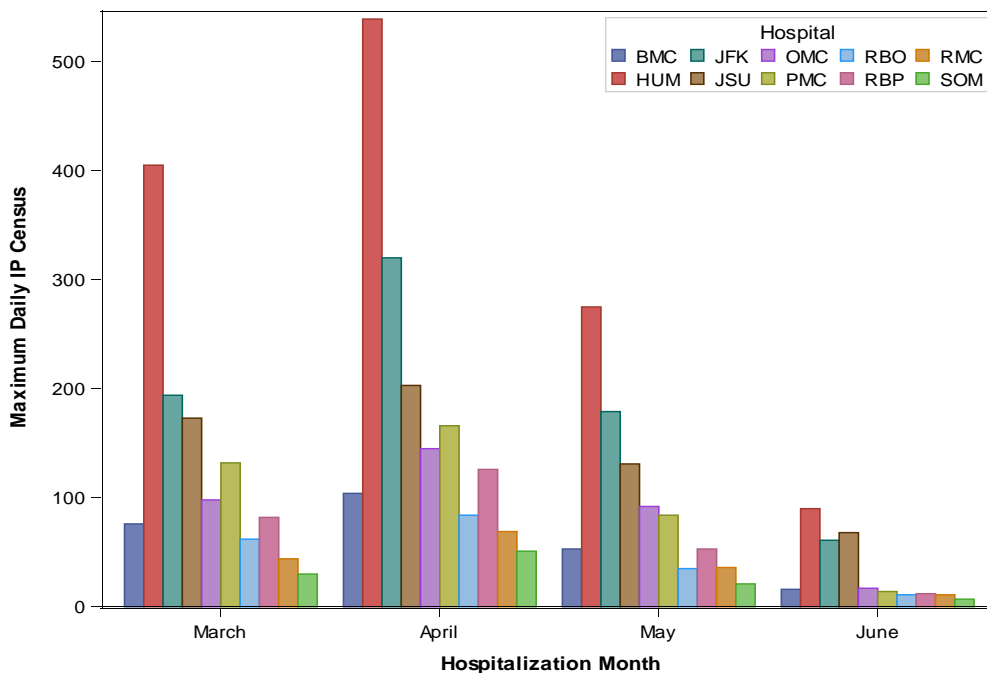

**Figure S2.** Spaghetti plot of inpatient COVID-19 patients in 13 HMH Hospitals between March to June 2020.

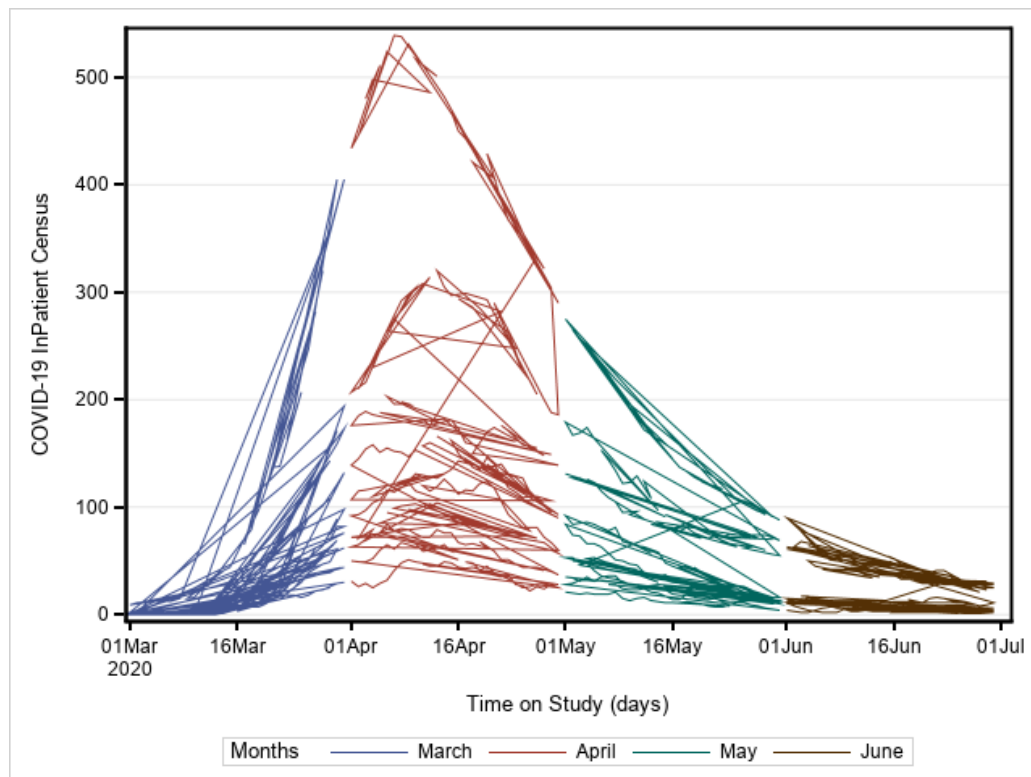

**Table S2.** Univariate and Multivariate Cox Regression Analyses of Propensity Score Matched Population

| Univariate Cox Regression                         |                     |         | Multivariate Cox Regression                       |                   |         |
|---------------------------------------------------|---------------------|---------|---------------------------------------------------|-------------------|---------|
| Comparison                                        | HR (95% CI)         | P-Value | Comparison                                        | HR (95% CI)       | P-Value |
| Male vs Female                                    | 1.20 (0.93, 1.56)   | 0.1691  | <b>Model 1: MP vs NMP</b>                         |                   |         |
| Age>60 vs <60                                     | 2.83 (2.05, 3.91)   | <.0001  | MP vs NMP                                         | 0.40(0.27,0.59)   | <0.0001 |
| Current vs Non Smoker                             | 0.62(0.29, 1.32)    | 0.2154  | Nursing home vs Residential                       | 3.08(1.94,4.89)   | >0.0001 |
| Former vs Current Smoker                          | 1.21(0.91, 1.61)    | 0.1934  | CAD vs None                                       | 2.12(1.38,3.27)   | 0.0006  |
| Unknown Race vs Asian                             | 2.08(1.11, 3.89)    | 0.0224  | Invasive Mechanical Ventilation vs None           | 2.87(1.64,5.02)   | 0.0002  |
| Black vs Asian                                    | 1.00(0.56, 1.79)    | 0.9926  | Non-Mechanical Ventilation Oxygen Support vs None | 1.11(0.60,2.05)   | 0.7483  |
| Other Race vs Asian                               | 1.12(0.65, 1.91)    | 0.6887  | <b>Model 2: Dose (LD or HD) vs NMP</b>            |                   |         |
| White vs Asian                                    | 1.33(0.81, 2.20)    | 0.2651  | HD MP vs NMP                                      | 0.48(0.30,0.77)   | 0.0025  |
| Academic vs Community Hospital                    | 1.18 (0.91, 1.52)   | 0.2105  | LD MP vs NMP                                      | 0.35(0.22,0.53)   | <0.0001 |
| Nursing Home vs Home                              | 2.81(1.99, 3.96)    | <.0001  | Nursing Home vs Residential                       | 2.95(1.83,4.76)   | <0.0001 |
| <b>Symptoms</b>                                   |                     |         | CAD vs None                                       | 2.22 (1.44,3.42)  | 0.0003  |
| Fever vs None                                     | 0.88 (0.67, 1.15)   | 0.3445  | Invasive Mechanical Ventilation vs None           | 2.77(1.58,4.86)   | 0.0004  |
| SOB vs None                                       | 1.18 (0.91, 1.53)   | 0.2233  | Non-Mechanical Ventilation Oxygen Support vs None | 1.13(0.61,2.09)   | 0.6992  |
| Cough vs None                                     | 0.79 (0.61, 1.01)   | 0.0641  | <b>Model 3: Dose and Duration</b>                 |                   |         |
| AMS vs None                                       | 3.14(2.32, 4.26)    | <.0001  | HD MP 7-14 Days vs LD MP 7-14 days                | 1.91(0.82,4.45)   | 0.1338  |
| GI vs None                                        | 0.66(0.47, 0.93)    | 0.0185  | HD MP ≥14 days vs LD MP ≥ 14 days                 | 1.07(0.44,2.59)   | 0.8899  |
| Anosmia or Ageusia vs None                        | NA                  | <.0001  | HD MP ≤ 7 days vs LD MP ≤ 7 days                  | 1.36 (0.78,2.38)  | 0.2836  |
| Duration of Symptoms PTA > 7 vs ≤ 7 days          | 0.61 (0.41, 0.91)   | 0.0143  | LD MP 7-14 days vs LD MP ≥ 14 days                | 1.27(0.60,2.69)   | 0.5434  |
| <b>Comorbidities</b>                              |                     |         | LD MP 7-14 days vs LD MP ≤ 7 days                 | 0.45(0.22,0.91)   | 0.0273  |
| Diabetes vs None                                  | 1.06 (0.82, 1.37)   | 0.6503  | LD MP ≥ 14 days vs NMP                            | 0.16(0.09,0.28)   | <0.0001 |
| COPD vs None                                      | 2.44 (1.64, 3.63)   | <.0001  | LD MP ≤ 7 days vs NMP                             | 0.46 (0.29,0.73)  | 0.001   |
| Asthma vs None                                    | 0.89 (0.56,1.41)    | 0.6042  | <b>Model 4: Methylprednisolone vs Tocilizumab</b> |                   |         |
| COPD/Asthma vs None                               | 1.49(1.07, 2.05)    | 0.0169  | MP vs TOC                                         | 0.32 (0.12,0.86)  | 0.0231  |
| Hypertension vs None                              | 2.12 (1.60, 2.81)   | <.0001  | MP and TOC vs TOC                                 | 0.26 (0.09,0.73)  | 0.0116  |
| Cancer vs None                                    | 2.08 (1.46, 2.97)   | <.0001  | <b>Model 5: MP Dose (LD or HD) vs Tocilizumab</b> |                   |         |
| CAD vs None                                       | 2.09 (1.56, 2.79)   | <.0001  | HD MP and TOC vs TOC                              | 0.26 (0.08,0.86)  | 0.0260  |
| CVA vs None                                       | 2.24 (1.44, 3.50)   | 0.0004  | LD MP vs TOC                                      | 0.26 (0.09, 0.73) | 0.0116  |
| CHF vs None                                       | 2.12 (1.41, 3.21)   | 0.0004  | LD MP and TOC vs TOC                              | 0.26 (0.09, 0.74) | 0.0122  |
| Arrhythmia vs None                                | 2.07 (1.43, 2.98)   | 0.0001  |                                                   |                   |         |
| Renal Failure vs None                             | 1.95 (1.37, 2.78)   | 0.0002  |                                                   |                   |         |
| Dialysis vs None                                  | 0.74 (0.39, 1.43)   | 0.3726  |                                                   |                   |         |
| Elevated LFTS vs None                             | 1.03 (0.80, 1.33)   | 0.8142  |                                                   |                   |         |
| <b>Oxygen Support</b>                             |                     |         |                                                   |                   |         |
| Low Oxygen Saturation vs None                     | 0.99 (0.77, 1.28)   | 0.9307  |                                                   |                   |         |
| Invasive Mechanical Ventilation vs None           | 1.62 (1.16, 2.27)   | 0.0051  |                                                   |                   |         |
| Non-Mechanical Ventilation Oxygen Support Vs None | 0.98 (0.64, 1.50)   | 0.9233  |                                                   |                   |         |
| <b>qSOFA</b>                                      |                     |         |                                                   |                   |         |
| qSOFA 3 vs 0                                      | 10.23 (5.00, 20.96) | <.0001  |                                                   |                   |         |
| qSOFA 2 vs 0                                      | 3.64 (2.41, 5.50)   | <.0001  |                                                   |                   |         |
| qSOFA 1 vs 0                                      | 1.42 (1.07, 1.90)   | 0.0169  |                                                   |                   |         |
| <b>COVID-19 Treatment</b>                         |                     |         |                                                   |                   |         |
| Hydroxychloroquine vs None                        | 0.41 (0.30, 0.56)   | <.0001  |                                                   |                   |         |
| Azithromycin vs None                              | 0.64 (0.49, 0.84)   | 0.0012  |                                                   |                   |         |



|                                             |                   |        |  |  |
|---------------------------------------------|-------------------|--------|--|--|
| HCQ and Az vs None                          | 0.89 (0.19, 4.26) | 0.8860 |  |  |
| Remdesivir vs None                          | 0.78 (0.34, 1.81) | 0.5637 |  |  |
| Tocilizumab vs None                         | 0.68 (0.47, 0.98) | 0.0407 |  |  |
| Convalescent Plasma vs None                 | 0.23 (0.03, 1.74) | 0.1558 |  |  |
| <b><i>Methylprednisolone</i></b>            |                   |        |  |  |
| <b><i>Dose</i></b>                          |                   |        |  |  |
| MP vs NMP                                   | 0.44 (0.33, 0.60) | <.0001 |  |  |
| HD MP vs NMP                                | 0.61 (0.44, 0.85) | 0.0033 |  |  |
| LD MP vs NMP                                | 0.34 (0.24, 0.48) | <.0001 |  |  |
| <b><i>Duration</i></b>                      |                   |        |  |  |
| MP $\leq 7$ vs $> 7$ days                   | 1.86 (1.36, 2.56) | <.0001 |  |  |
| HD MP $\leq 7$ vs $> 7$ days                | 2.00 (1.25, 3.20) | 0.0039 |  |  |
| HD vs LD MP $\leq 7$ days                   | 1.73 (1.11, 2.70) | 0.0157 |  |  |
| HD MP $\leq 7$ days vs LD MP $> 7$ days     | 4.01 (2.45, 6.57) | <.0001 |  |  |
| HD MP $\leq 7$ days vs NMP                  | 0.82 (0.55, 1.20) | 0.3095 |  |  |
| HD MP $> 7$ days vs LD MP $\leq 7$ days     | 0.87 (0.55, 1.35) | 0.5364 |  |  |
| HD MP $> 7$ days vs LD MP $> 7$ days        | 2.01 (1.22, 3.30) | 0.0061 |  |  |
| HD MP $> 7$ days vs NMP                     | 0.41 (0.26, 0.62) | <.0001 |  |  |
| LD MP $\leq 7$ vs $> 7$ days                | 2.32 (1.43, 3.75) | 0.0006 |  |  |
| LD MP $\leq 7$ days vs NMP                  | 0.47 (0.32, 0.71) | 0.0002 |  |  |
| LD MP $> 7$ days vs NMP                     | 0.20 (0.13, 0.32) | <.0001 |  |  |
| <b><i>Timing from Onset of Symptoms</i></b> |                   |        |  |  |
| $>7-14$ days vs $\leq 7$ days               | 0.70 (0.49, 0.99) | 0.0462 |  |  |
| $>14$ days vs $\leq 7$ days                 | 0.32 (0.16, 0.63) | 0.0010 |  |  |

**Figure S3.** Boxplot of fraction of inspired oxygen ( $FiO_2$ ) reported on COVID-19 patients NMP, LD MP, and HD MP.

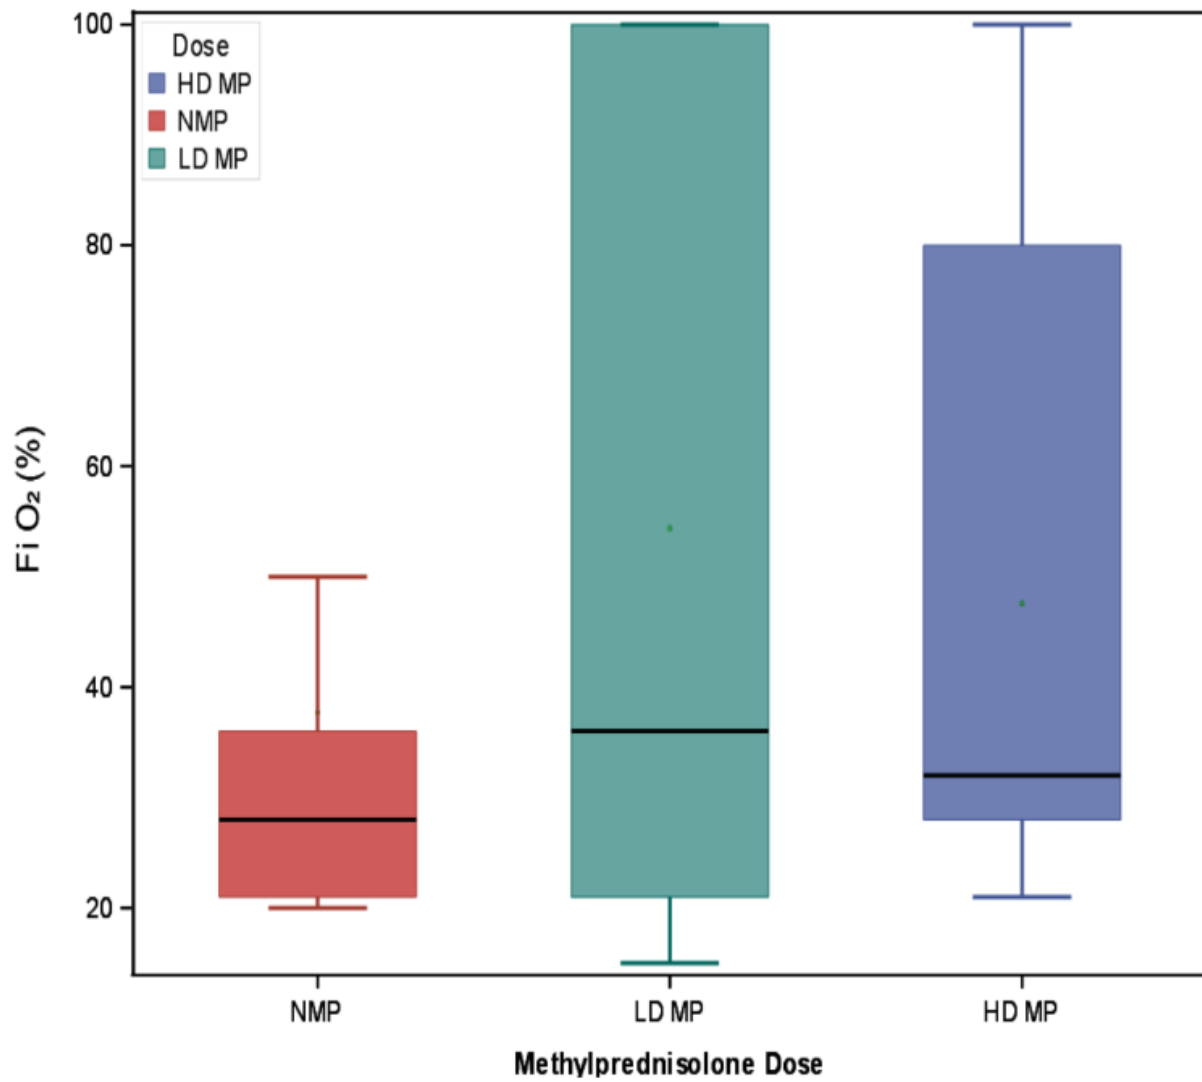

**Figure S4.** Plot of differences Methylprednisolone – No Methylprednisolone in hospitalized COVID-19 patients. The plot shows that the differences were very close to zero as were the Logit propensity scores.

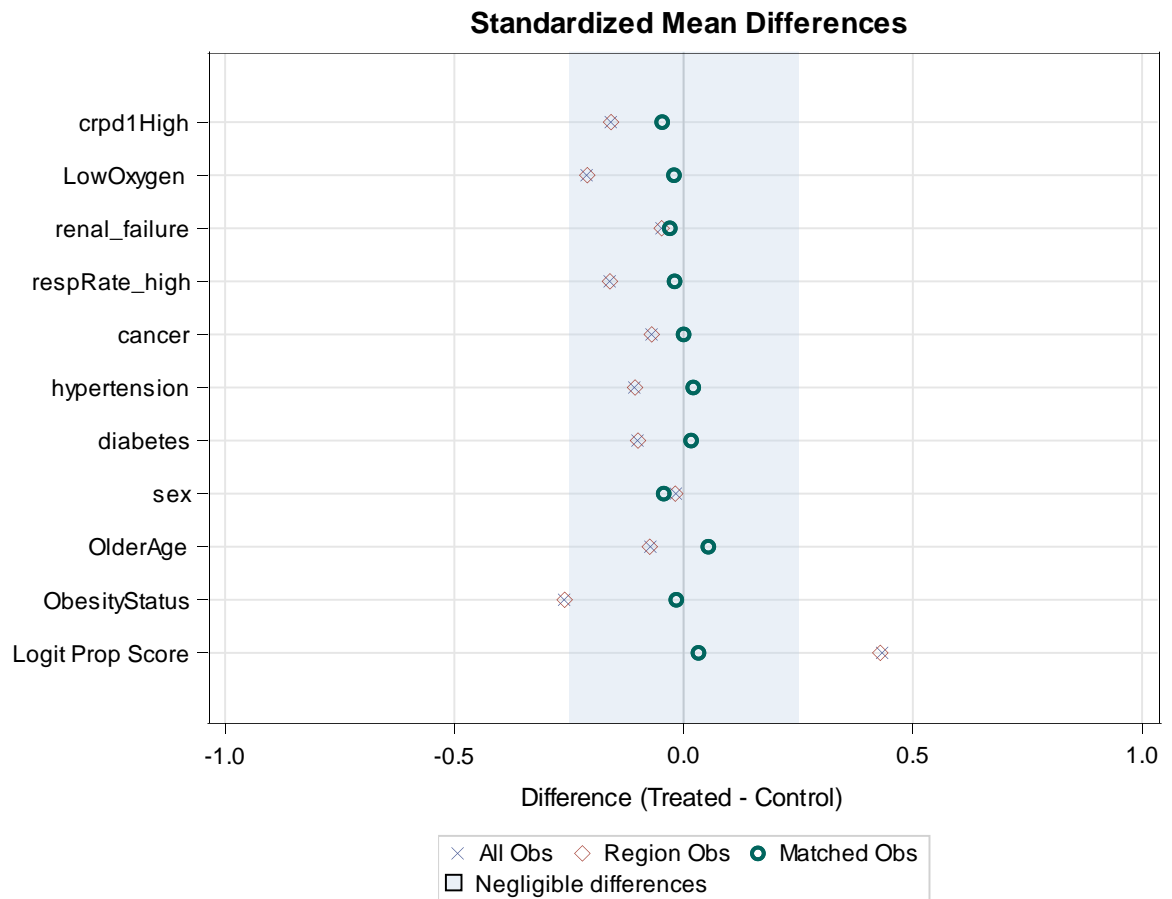

**Figure S5.** Comparison Boxplots of distributions of Logit of Propensity Scores for MP– NMP treated COVID-19 patients. The boxplots show that the two distributions are well balanced for the MP-NMP matched observations.

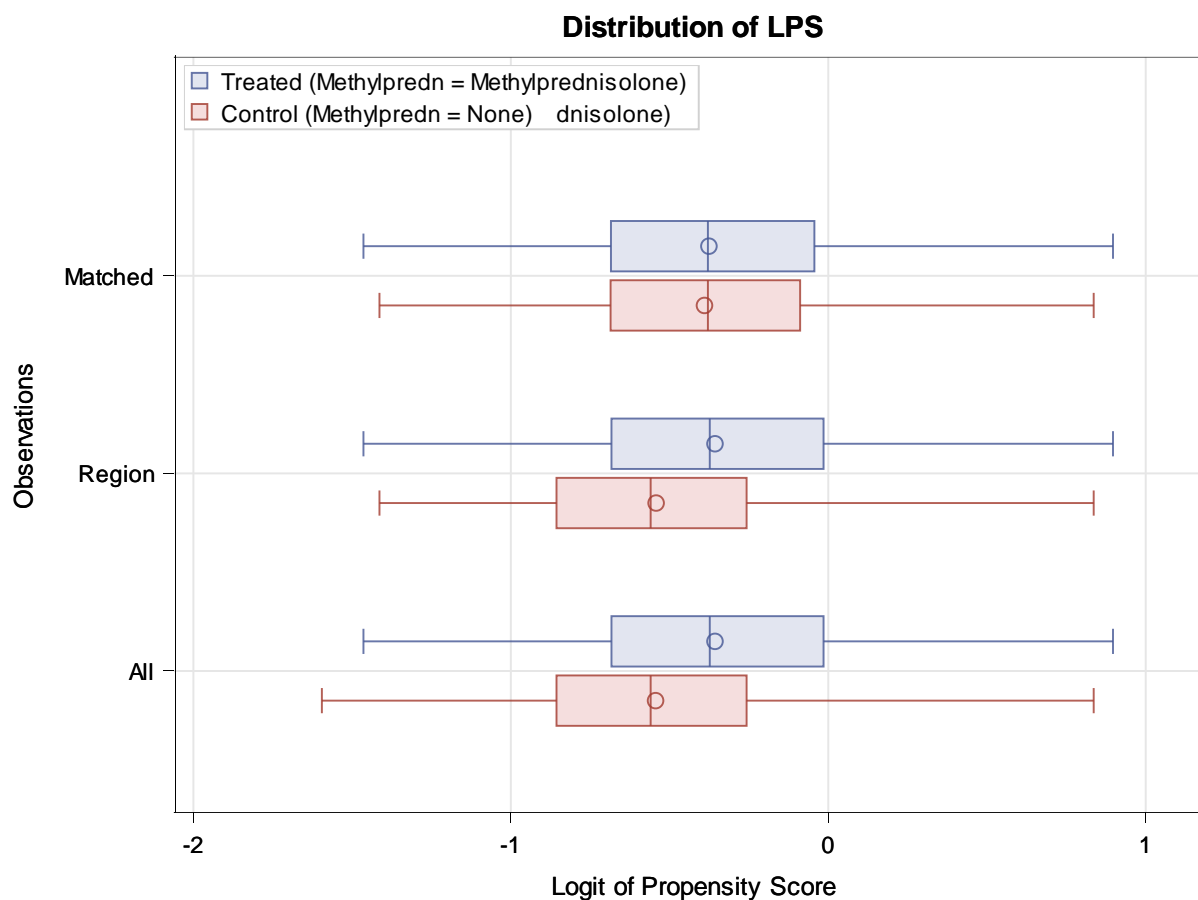

**Figure S6.** LPS Cloud Plots showing Distributions of Logit of Propensity Scores for MP and NMP treated COVID-19 patients. The propensity matching procedure failed to match only 8 of the methylprednisolone patients with any of patients who did not receive methylprednisolone during their COVID-19 hospitalization.

Taken together, Table S1 and Table S2 and Figures S1-S3 show that that propensity matched sample of 384 pairs yielded reasonably well-balanced distributions to conduct subsequent analyses.

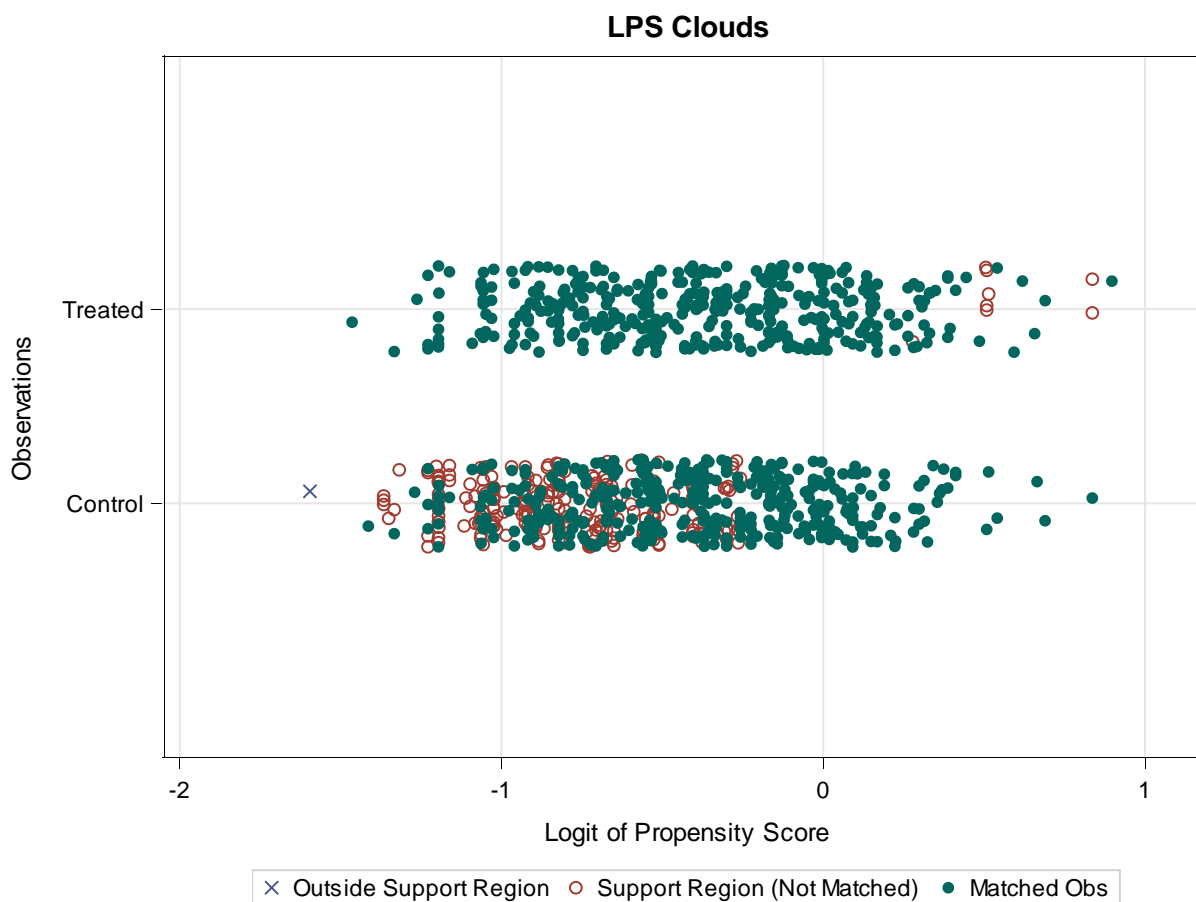

**Figure S7.** Kaplan-Meier Plot of in-hospital survival for no methylprednisolone (NMP) and methylprednisolone (MP) treated cohorts in admitted COVID-19 patients. Out of the 380 patients in the NMP cohort, 99 (25.8%) expired during COVID-19 hospital stay. Out of the 379 patients in the MP cohort, 143 (33.6%) expired during COVID-19 hospital stay. 30-Day and 60-Day in-hospital survival for the NMP cohort were 31.5% (95% CI 19.0% to 45.4%) and 18.0% (95% CI 4.5% to 37.7%), respectively. 30-Day and 60-Day In-hospital survival for the MP cohort were 43.6% (95% CI 36.5% to 50.9%) and 19.7% (95% CI 8.7% to 33.8%), respectively. The difference in In-hospital survival between the NMP (median=25.0 days (95% CI 22.0 to 32.0 days)] and MP (median =19.0 days (95% CI 14.0 to 25 days)] was statistically significant (Stratified Log-rank  $P < 0.0001$ ). These data indicate there was survival benefit for the patients that were treated with methylprednisolone.

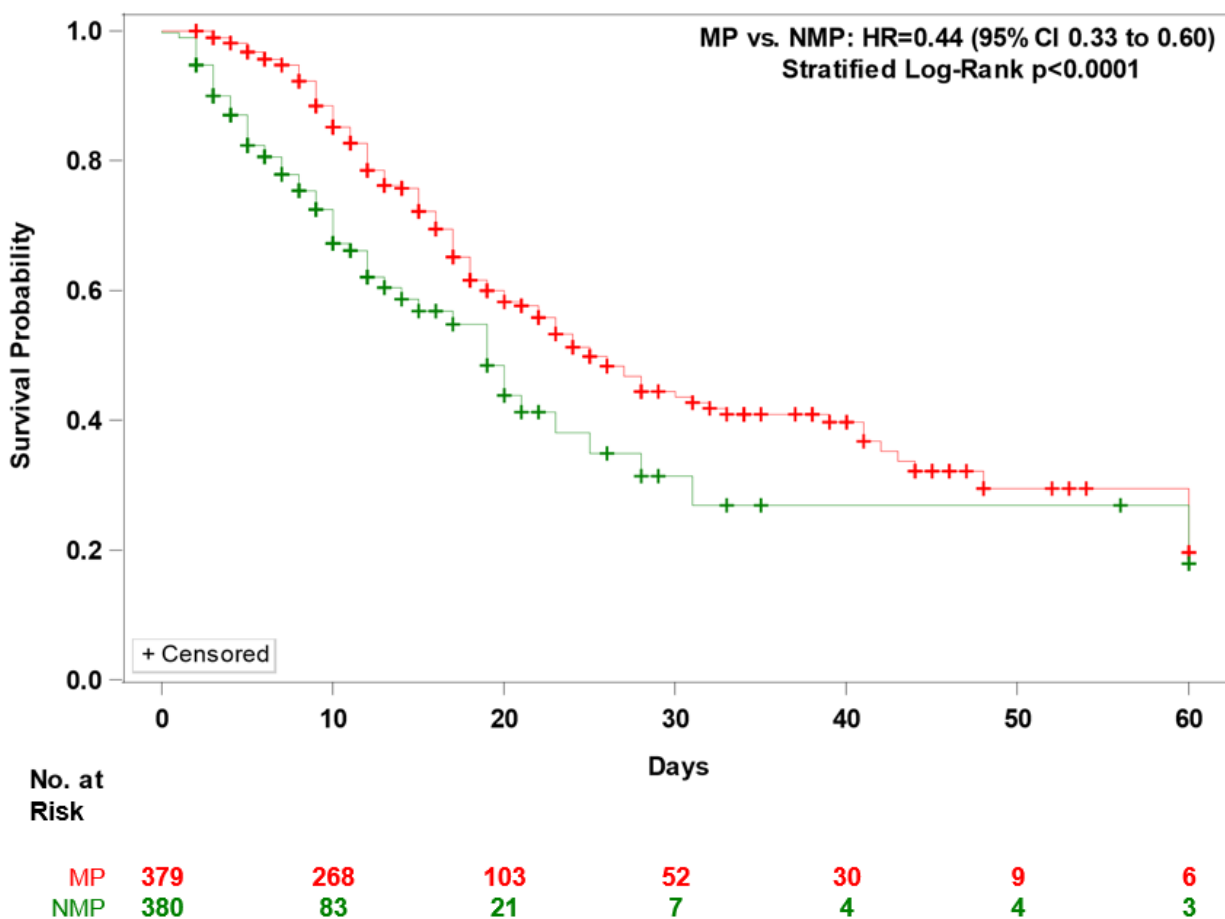

**Figure S8.** A plot of log cumulative hazard function ( $-\log(\text{survival function})$ ) by time for MP and NMP treated COVID-19 patients. The plot showed that cumulative hazard function made a sharp increase by day 40 and the no methylprednisolone cohort had a mild slowing rate around 30 days. This graph indicates that the methylprednisolone the proportional hazard assumption may not been satisfied.

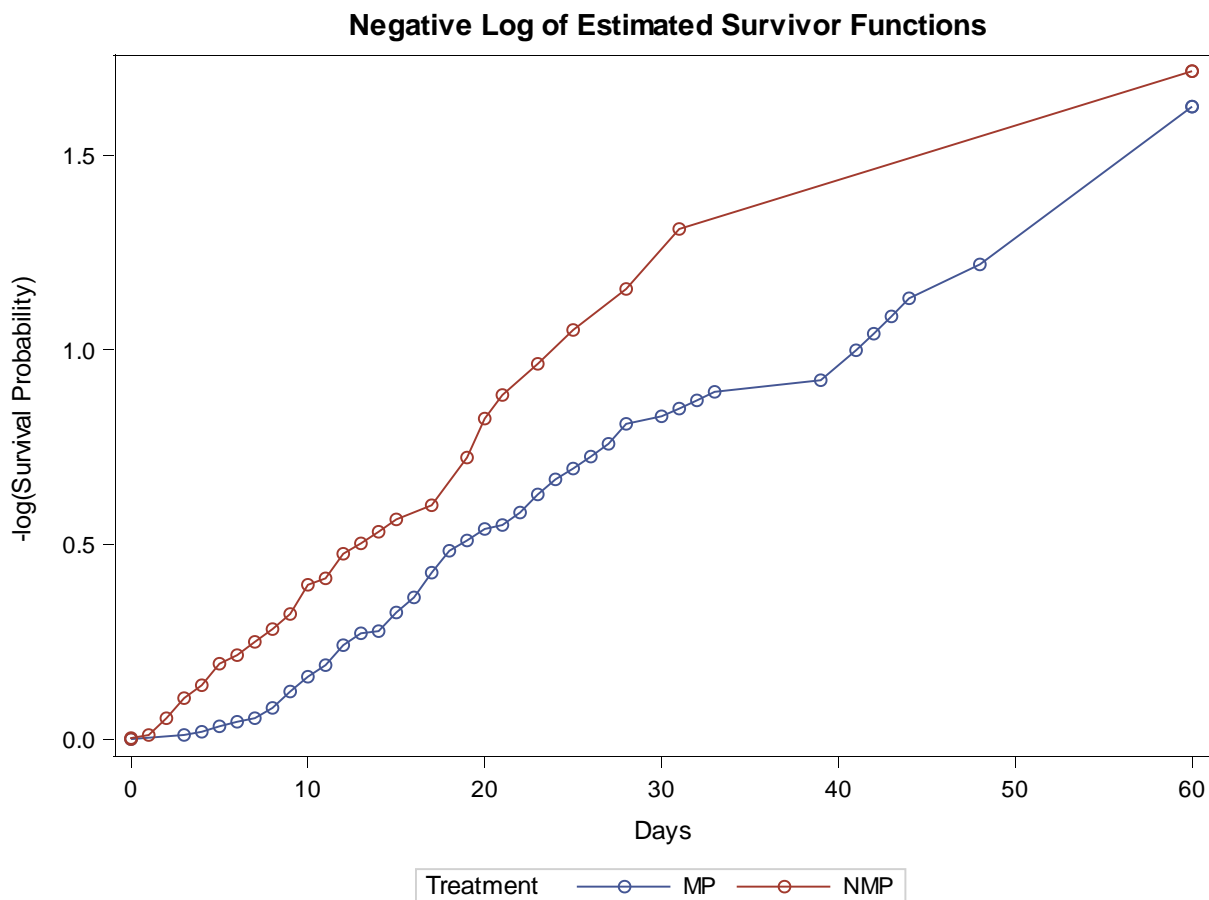

**Figure S9.** A plot of log cumulative hazard function ( $-\log(\text{survival function})$ ) by  $\log(\text{time})$  in MP and NMP treated COVID-19 patients. The shows that hazard in the methylprednisolone cohort were increasing more rapidly after 2 ( $\log(\text{Days})$ ) indicating there was a possible interaction between methylprednisolone and days since admission.

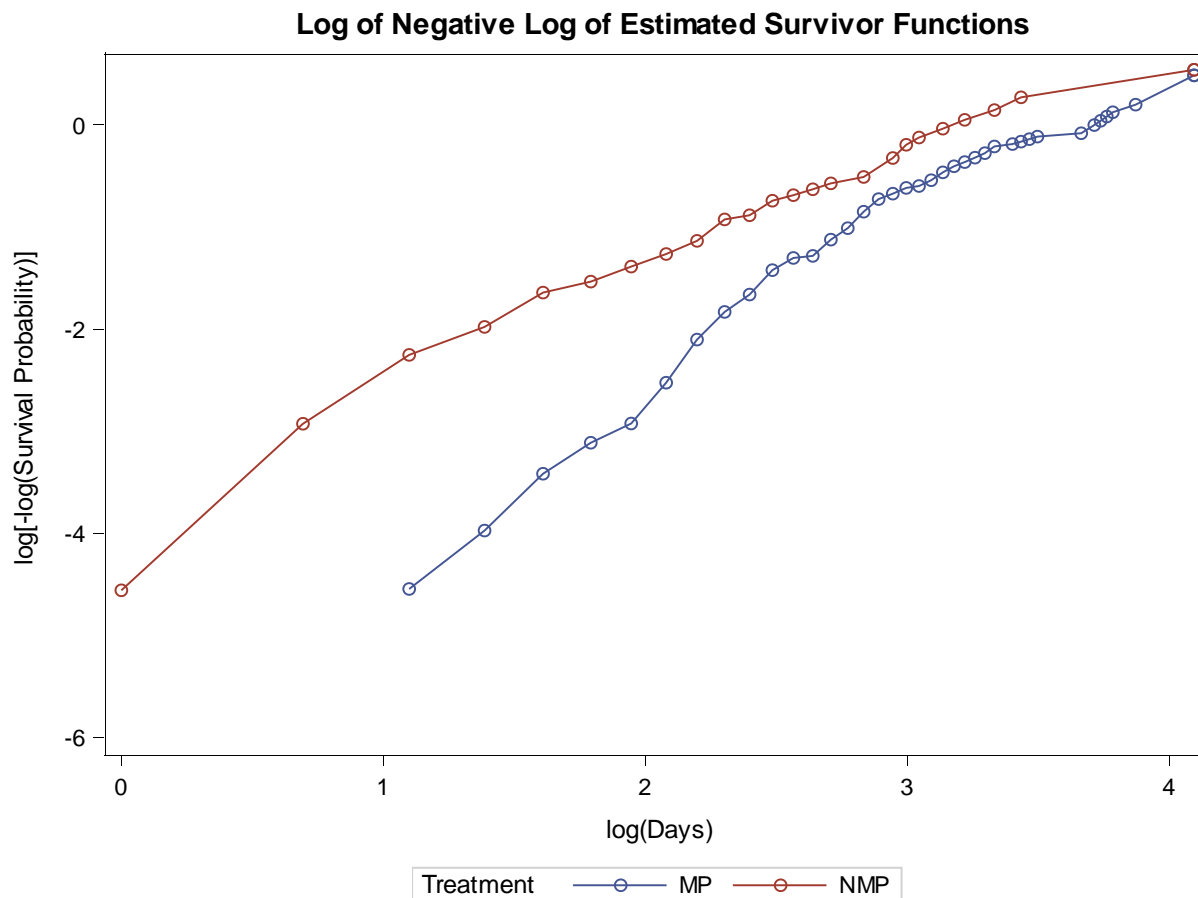



**Figure S10.** Kaplan-Meier Plot of in-hospital survival for no methylprednisolone (NMP), low dose methylprednisolone (LD MP) and high dose methylprednisolone (HD MP) treated cohorts in admitted COVID-19 patients. Out of the 380 patients in the NMP cohort, 99 (25.8%) expired during COVID-19 hospital stay. Out of the 215 patients in the LD MP cohort, 69 (31.9%) expired during COVID-19 hospital stay. Out of the 164 patients in the HD MP cohort, 74 (55.2%) expired during COVID-19 hospital stay. 30-Day and 60-Day in-hospital survival for the NMP cohort were 31.5% (95% CI 19.0% to 45.4%) and 18.0% (95% CI 4.5% to 37.7%), respectively. 30-Day and 60-Day In-hospital survival for the LD MP cohort were 54.2% (95% CI 44.8% to 63.5%) and 19.1% (95% CI 1.1% to 51.4%), respectively. 30-Day and 60-Day In-hospital survival for the HD MP cohort were 29.6% (95% CI 19.8% to 40.4%) and 14.4% (95% CI 5.0% to 27.9%), respectively. The difference in In-hospital survival between the NMP (median=25.0 days (95% CI 22.0 to 32.0 days)) and LD MP (median =39.0 days (95% CI 27.0 to N/A days)) and HD MP (median =20.0 days (95% CI 17.0 to 24 days)) was statistically significant (Stratified Log-rank  $P < 0.0001$ ). These data indicate there was survival benefit for the patients that were treated with LD MP throughout the Day 60 follow-up. In contrast, the HD MP had survival benefit over not the NMP but the KM plot show by Day 18 the benefit had diminished such that the HD MP and NMP were crisscrossing all the way through Day 40, beyond which in-hospital survival kept declining below the MP cohort.

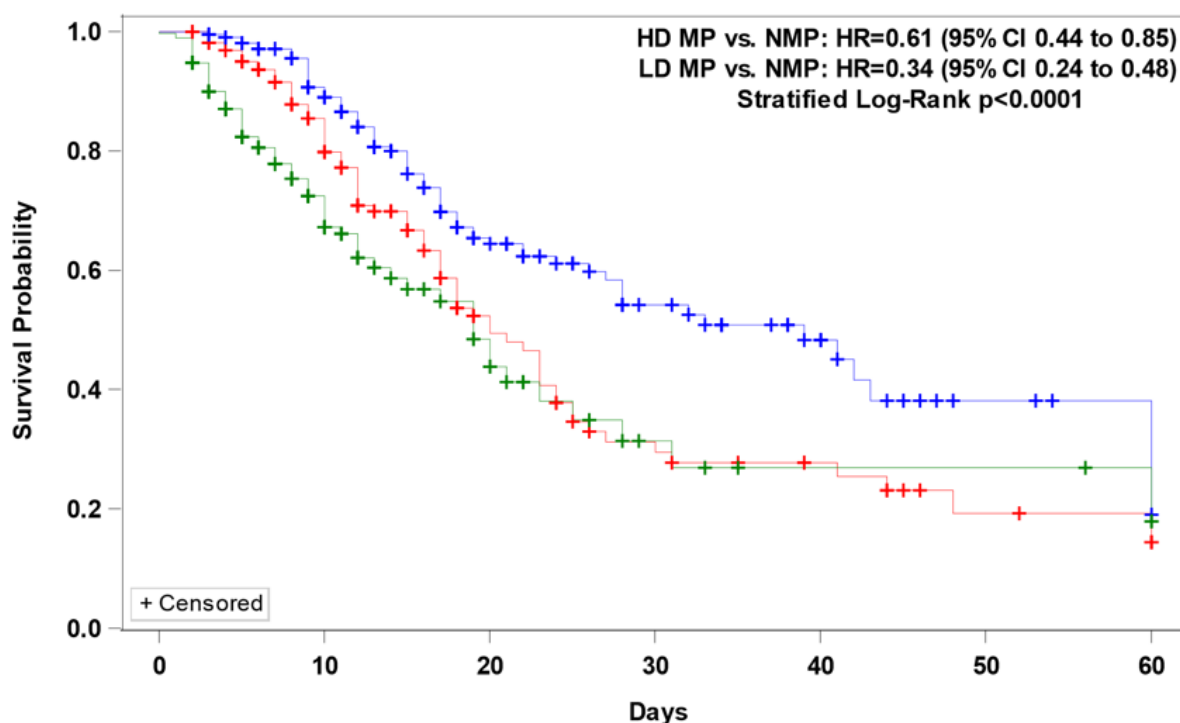

| No. at Risk | 0   | 10  | 20 | 30 | 40 | 50 | 60 |
|-------------|-----|-----|----|----|----|----|----|
| HD MP       | 164 | 106 | 36 | 18 | 12 | 5  | 4  |
| LD MP       | 215 | 162 | 67 | 34 | 18 | 4  | 2  |
| NMP         | 380 | 83  | 21 | 7  | 4  | 4  | 3  |

**Figure S11.** The plot of  $\log(\text{cumulative hazard})$ (-negative survival) by days for the NMP, LD MP and HD MP treated COVID-19 patients. The graph shows that cumulative hazard in HD and LD methylprednisolone were increased and in particular the HD MP was increasing much faster than LD after 40 days, this suggests that the proportional hazard assumption may not have been met.

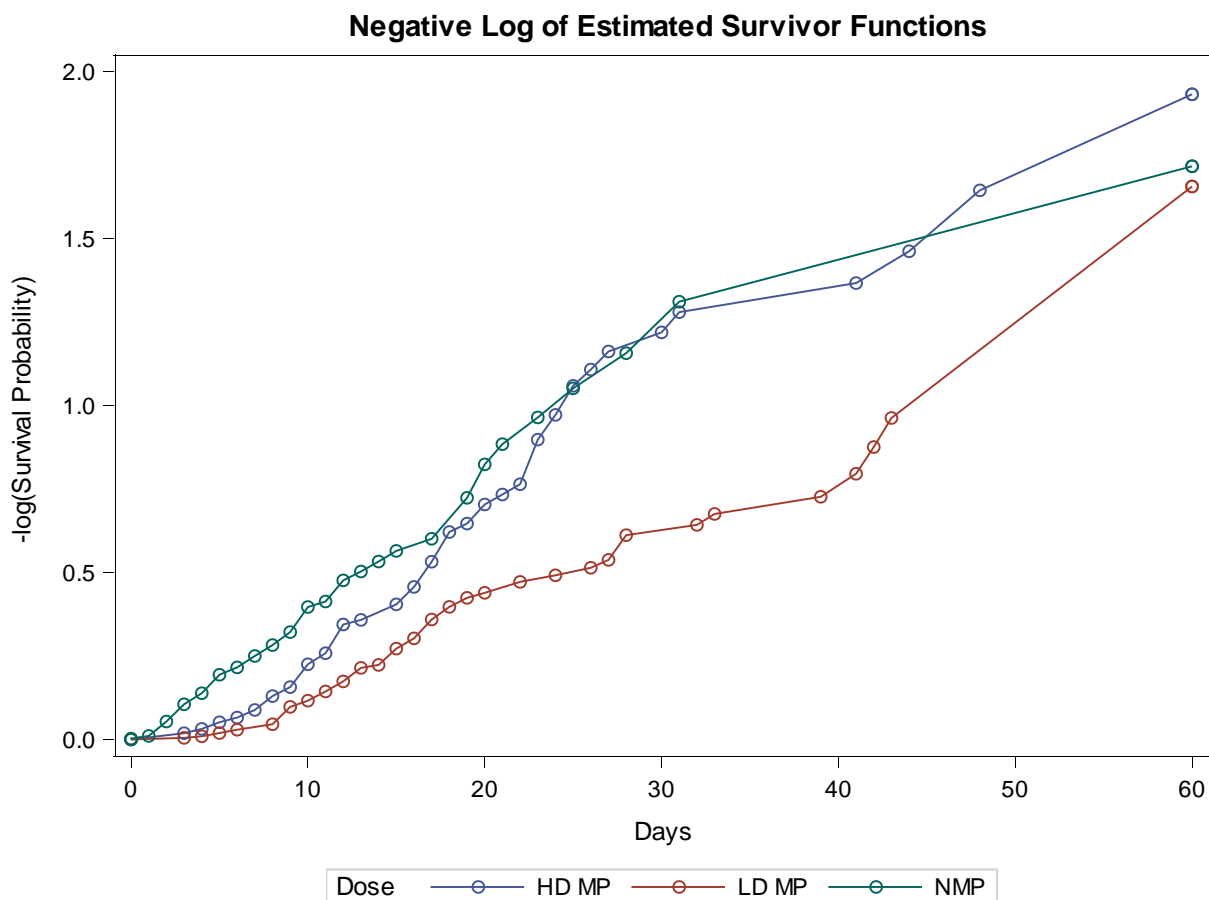

**Figure S12.** The plot of log cumulative hazard (-negative survival) by log (days) in NMP , LD MP , HD MP treated COVID-19 patients. show that cumulative hazard in HD and LD methylprednisolone were increase and in particular the HD MP was increasing much faster than LD after 2 log days, and by 3 log days, the HD MP and NMP are the same path while LD increased slowly before increasing faster before 4 log days. This suggest that the proportional hazard assumption may not have been met.

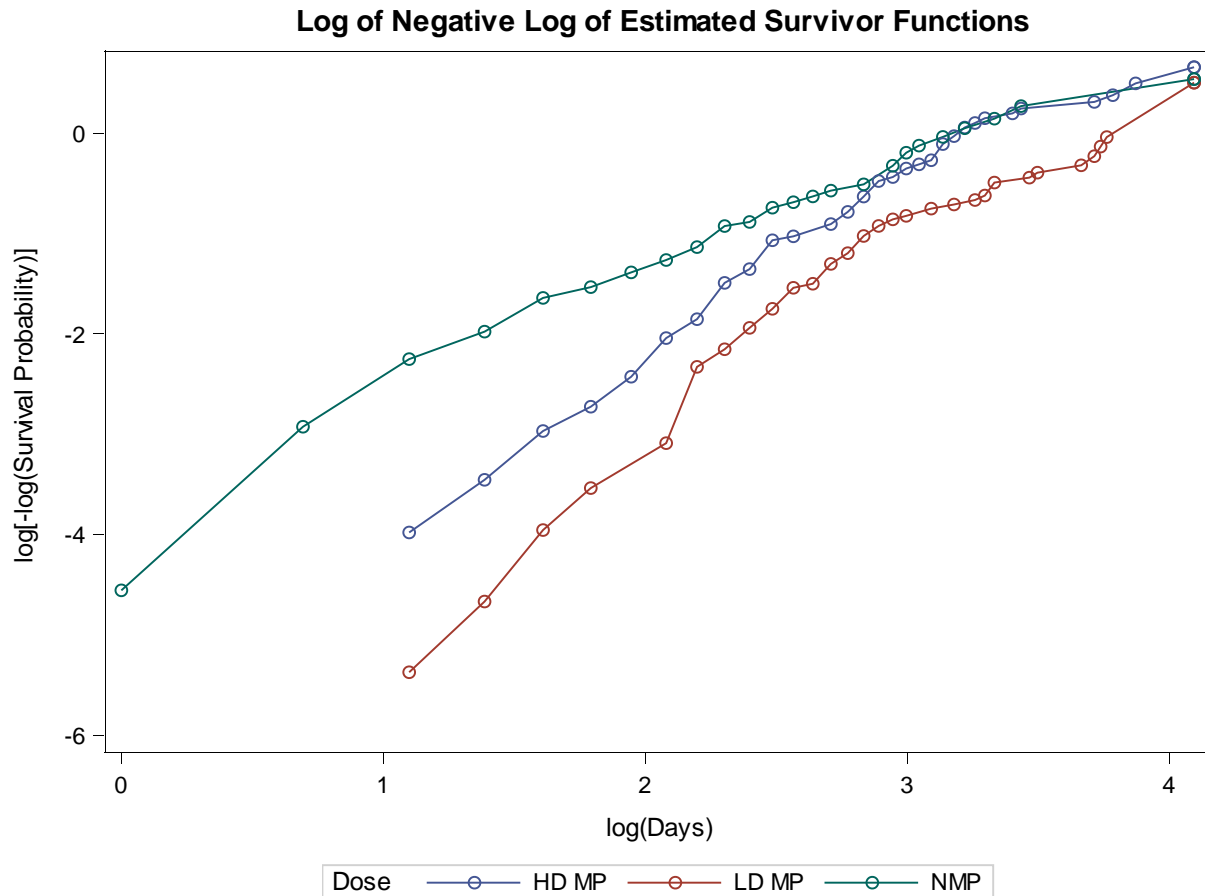

In the following, we examined the proportional assumption using a formal test of Supremum test of proportionality, Lin, Wei, Ying (1993). Table S3 is a summary of all the covariates that were indicated to failed to satisfy the proportional based on the Supremum test. Tables S4 – S10 contain the results of the test for each variable included in the propensity matched cohort.

**Figure S13.** Plot of observed standardized score process of methylprednisolone vs. 20 simulated realizations. The plot shows that with the first 20 of 1,000 simulated realizations (depicted by thin dotted line) conducted here, the observed MP process (depicted by the thick solid line) exhibited significant deviation from the paths of simulations within the first 20 days since the COVID-19 admission and then thereafter the MP process was more typical with simulated realization. Over the 1000 simulated realization, the supremum test reported an absolute maximum value of 2.2103 with p-value of  $<0.0001$ . Thus, the test indicated that methylprednisolone administration significantly violated the proportional hazards assumption.

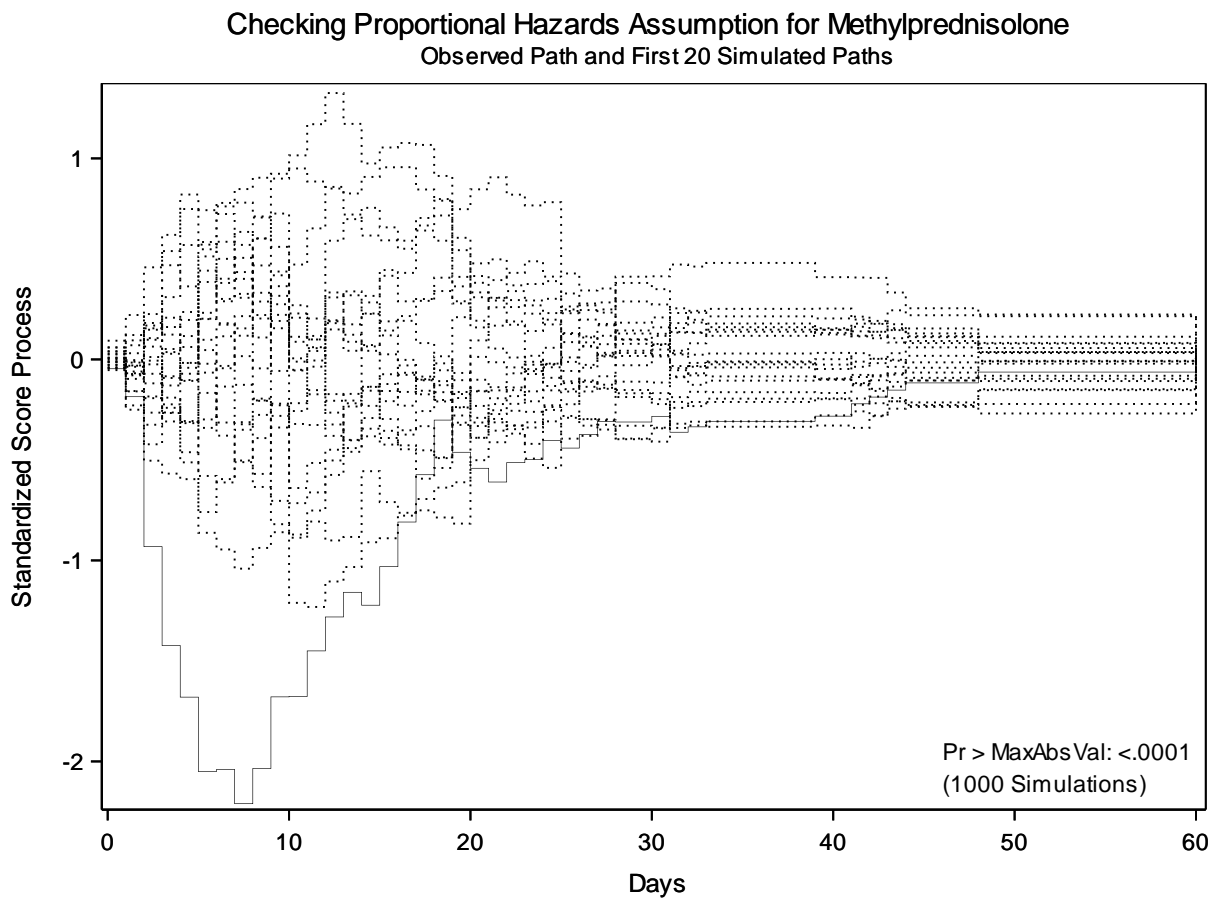

**Figure S14.** Plot of observed standardized score process of methylprednisolone (MP) dose level (NMP, LD, HD) vs. 20 simulated realizations. The plot shows that with the first 20 of 1,000 simulated realizations (depicted by thin dotted line) conducted here, the observed MP dose process (depicted by the thick solid line) exhibited significant deviation from the paths of simulations within the first 20 days since the COVID-19 admission and then thereafter the MP dose process was more typical with simulated realizations. Over the 1000 simulated realization, the supremum test reported an absolute maximum value of 2.360 with p-value of  $<0.0001$ . Thus, the test indicated that methylprednisolone dose level significantly violated the proportional hazards assumption.

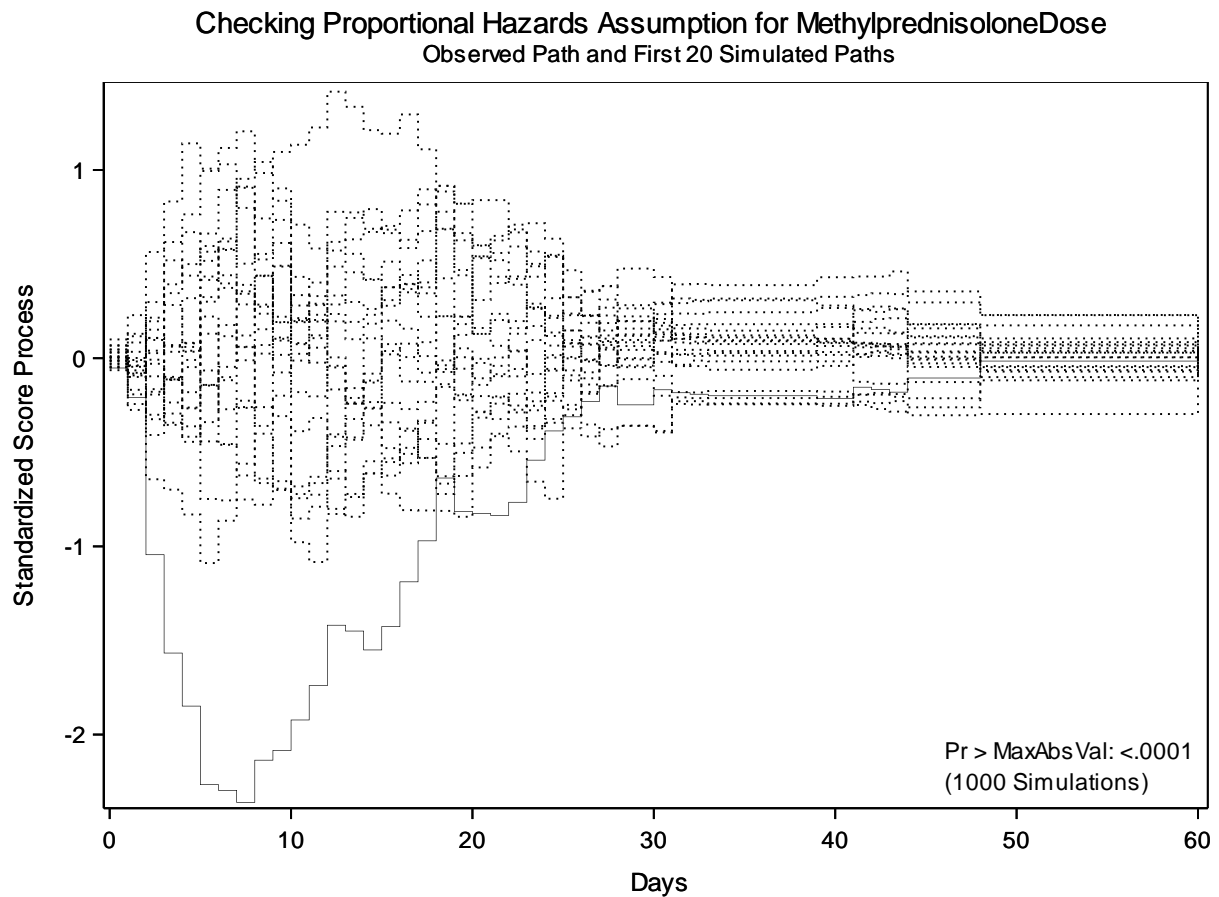

**Figure S15.** Plot of observed standardized score process of  $\text{FiO}_2$  (%) vs. 20 simulated realizations. The plot shows that with the first 20 of 1,000 simulated realizations (depicted by thin dotted line) conducted here, the observed  $\text{FiO}_2$  process (depicted by the thick solid line) exhibited significant deviation from the paths of simulations within the first 20 days since the COVID-19 admission and then thereafter the  $\text{FiO}_2$  process was more typical with simulated realizations. Over the 1000 simulated realization, the supremum test reported an absolute maximum value of 2.4993 with p-value of  $<0.0001$ . Thus, the test indicated that  $\text{FiO}_2$  level significantly violated the proportional hazards assumption.

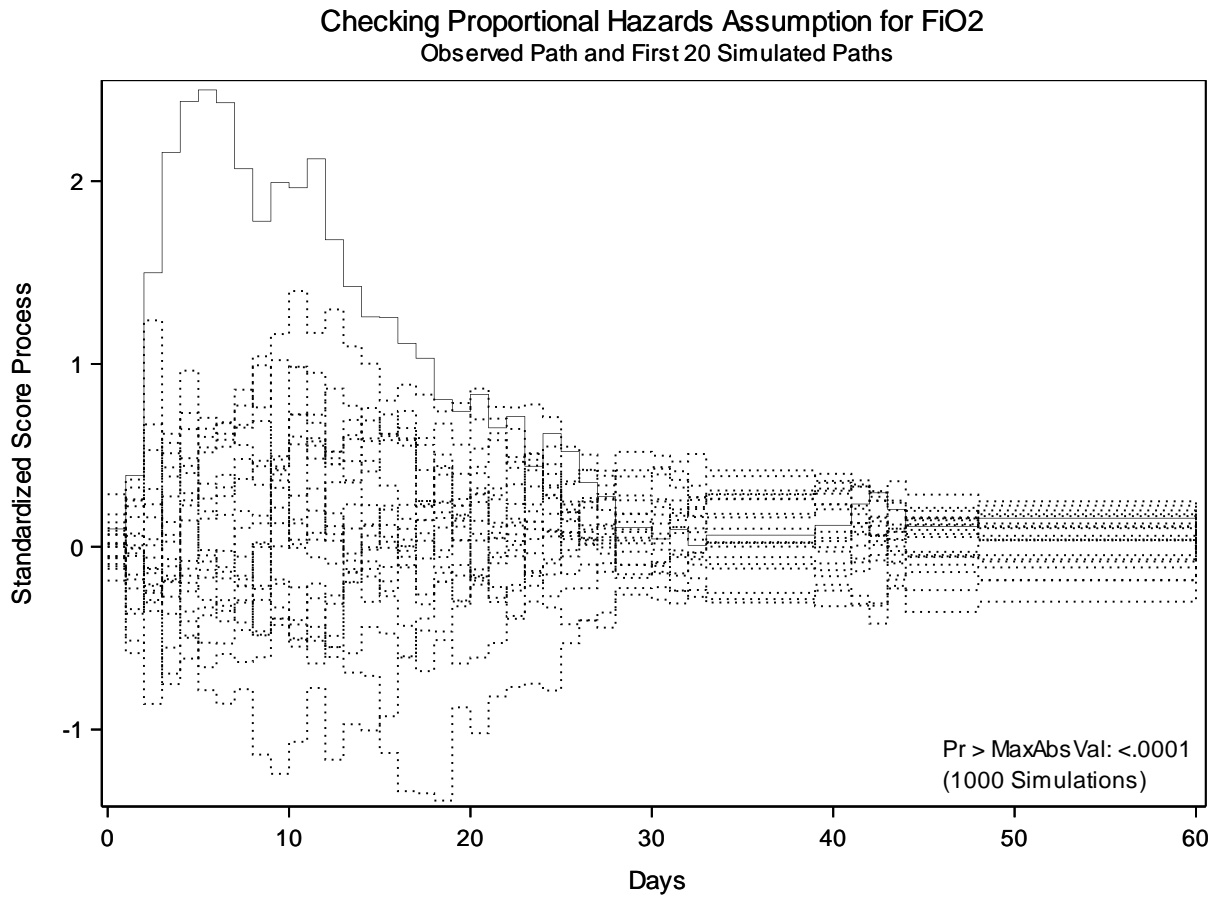

**Table S3.** Assessment of the Proportional Hazards Assumptions in Baseline Characteristics in COVID-19 Patients

| Variable                               | Max Abs Value | Replications | Seed      | P-Value          |
|----------------------------------------|---------------|--------------|-----------|------------------|
| <b>Nursing Home</b>                    | <b>1.4886</b> | <b>1000</b>  | <b>19</b> | <b>0.0110</b>    |
| <b>Anosmia or Ageusia</b>              | <b>0.0030</b> | <b>1000</b>  | <b>19</b> | <b>&lt;.0001</b> |
| <b>WBC lower</b>                       | <b>2.3013</b> | <b>1000</b>  | <b>19</b> | <b>&lt;.0001</b> |
| <b>Creatinine high</b>                 | <b>1.2404</b> | <b>1000</b>  | <b>19</b> | <b>0.0400</b>    |
| <b>Respiratory Rate high</b>           | <b>1.3106</b> | <b>1000</b>  | <b>19</b> | <b>0.0420</b>    |
| <b>Hydroxychloroquine</b>              | <b>1.6164</b> | <b>1000</b>  | <b>19</b> | <b>0.0020</b>    |
| <b>Methylprednisolone</b>              | <b>2.2103</b> | <b>1000</b>  | <b>19</b> | <b>&lt;.0001</b> |
| <b>HD/LD/No<br/>Methylprednisolone</b> | <b>2.3601</b> | <b>1000</b>  | <b>19</b> | <b>&lt;.0001</b> |
| <b>FiO<sub>2</sub></b>                 | <b>2.4993</b> | <b>1000</b>  | <b>19</b> | <b>&lt;.0001</b> |
| <b>qSOFA</b>                           | <b>1.5330</b> | <b>1000</b>  | <b>19</b> | <b>0.0200</b>    |
| <b>Calcium</b>                         | <b>1.3128</b> | <b>1000</b>  | <b>19</b> | <b>0.0360</b>    |
| <b>Initial BP (diastolic)</b>          | <b>1.4722</b> | <b>1000</b>  | <b>19</b> | <b>0.0330</b>    |

Supremum Test for Proportional Hazard Assumption. Any P<0.05 was Statistically Significant.

**Table S4.** Assessment of the Proportional Hazards Assumptions for the Demographic and comorbidities

| Variable                  | Max Abs Value | Replications | Seed      | P-Value          |
|---------------------------|---------------|--------------|-----------|------------------|
| Sex                       | 0.8227        | 1000         | 19        | 0.3490           |
| Older age                 | 1.0353        | 1000         | 19        | 0.1520           |
| Obesity status            | 1.1676        | 1000         | 19        | 0.0660           |
| Form current Smoker       | 0.6363        | 1000         | 19        | 0.6040           |
| Is Smoker                 | 0.5641        | 1000         | 19        | 0.7890           |
| <b>Nursing Home</b>       | <b>1.4886</b> | <b>1000</b>  | <b>19</b> | <b>0.0110</b>    |
| Fever                     | 0.3243        | 1000         | 19        | 0.9880           |
| SOB                       | 1.0332        | 1000         | 19        | 0.1350           |
| Cough                     | 0.9889        | 1000         | 19        | 0.1750           |
| AMS Symptoms              | 1.1986        | 1000         | 19        | 0.0530           |
| GI                        | 0.6098        | 1000         | 19        | 0.6500           |
| <b>Anosmia or Ageusia</b> | <b>0.0030</b> | <b>1000</b>  | <b>19</b> | <b>&lt;.0001</b> |
| Symptoms>7days            | 0.5481        | 1000         | 19        | 0.7380           |
| Duration symptom Cat      | 0.8762        | 1000         | 19        | 0.2280           |
| Diabetes                  | 0.6145        | 1000         | 19        | 0.6330           |
| COPD_O2                   | 0.6974        | 1000         | 19        | 0.4280           |
| COPD                      | 0.2846        | 1000         | 19        | 0.9930           |
| Asthma                    | 0.5324        | 1000         | 19        | 0.7420           |
| COPD/asthma               | 0.3837        | 1000         | 19        | 0.9530           |
| Hypertension              | 0.9271        | 1000         | 19        | 0.2310           |
| Cancer                    | 1.0278        | 1000         | 19        | 0.1280           |
| Coronary                  | 0.8326        | 1000         | 19        | 0.3160           |
| Coronary Stroke           | 1.1629        | 1000         | 19        | 0.0920           |
| Coronary Heart            | 0.9956        | 1000         | 19        | 0.1510           |
| Coronary Arrhythmia       | 0.8273        | 1000         | 19        | 0.2920           |



| Variable                   | Max Abs Value | Replications | Seed | P-Value |
|----------------------------|---------------|--------------|------|---------|
| Renal Failure              | 0.5449        | 1000         | 19   | 0.7580  |
| Renal Failure Dialysis     | 0.6128        | 1000         | 19   | 0.5880  |
| Rheumatic disease disorder | 0.6623        | 1000         | 19   | 0.5470  |

Supremum Test for Proportional Hazard Assumption. Any  $P < 0.05$  was Statistically Significant.

**Table S5.** Assessment of the Proportional Hazards Assumptions for the dichotomized lab values and respiratory rate

| Variable                     | Max Abs Value | Replications | Seed      | P-Value          |
|------------------------------|---------------|--------------|-----------|------------------|
| <b>WBC lower</b>             | <b>2.3013</b> | <b>1000</b>  | <b>19</b> | <b>&lt;.0001</b> |
| HBG lower norm               | 1.1560        | 1000         | 19        | 0.0730           |
| Platelet lower norm          | 0.6383        | 1000         | 19        | 0.5980           |
| Abs lymphocyte lower norm    | 0.6654        | 1000         | 19        | 0.4550           |
| IL-6 high                    | 1.1596        | 1000         | 19        | 0.0830           |
| CRP d1 High                  | 0.9503        | 1000         | 19        | 0.2040           |
| Ferritin high                | 0.5388        | 1000         | 19        | 0.7860           |
| D-dimer categ                | 0.9539        | 1000         | 19        | 0.2180           |
| <b>Creatinine high</b>       | <b>1.2404</b> | <b>1000</b>  | <b>19</b> | <b>0.0400</b>    |
| <b>Respiratory Rate high</b> | <b>1.3106</b> | <b>1000</b>  | <b>19</b> | <b>0.0420</b>    |

Supremum Test for proportional hazard assumption. Any  $p < 0.05$  was statistically significant.

**Table S6.** Assessment of the Proportional Hazards Assumptions for therapy for COVID-19

| Variable                           | Max Abs Value | Replications | Seed      | P-Value          |
|------------------------------------|---------------|--------------|-----------|------------------|
| <b>HCQ</b>                         | <b>1.6164</b> | <b>1000</b>  | <b>19</b> | <b>0.0020</b>    |
| Azithromycin                       | 0.8226        | 1000         | 19        | 0.3600           |
| HCQ and AZ                         | 0.7439        | 1000         | 19        | 0.2570           |
| Remdesivir                         | 0.7195        | 1000         | 19        | 0.4200           |
| Tocilizumab                        | 0.7093        | 1000         | 19        | 0.4830           |
| SAR                                | 0.8885        | 1000         | 19        | 0.2530           |
| Convalescent Plasma                | 0.4901        | 1000         | 19        | 0.3390           |
| <b>Methylprednisolone</b>          | <b>2.2103</b> | <b>1000</b>  | <b>19</b> | <b>&lt;.0001</b> |
| <b>HD/LD/No Methylprednisolone</b> | <b>2.3601</b> | <b>1000</b>  | <b>19</b> | <b>&lt;.0001</b> |

Supremum Test for proportional hazard assumption. Any  $p < 0.05$  was statistically significant

**Table S7.** Assessment of the Proportional Hazards Assumptions for clinical presentation parameters

| Variable               | Max Abs Value | Replications | Seed      | P-Value          |
|------------------------|---------------|--------------|-----------|------------------|
| Elevated LFTs          | 0.8344        | 1000         | 19        | 0.3650           |
| Low Oxygen             | 0.9414        | 1000         | 19        | 0.2120           |
| Supplemental Oxygen    | 0.8402        | 1000         | 19        | 0.3030           |
| <b>FiO<sub>2</sub></b> | <b>2.4993</b> | <b>1000</b>  | <b>19</b> | <b>&lt;.0001</b> |
| <b>qSOFA</b>           | <b>1.5330</b> | <b>1000</b>  | <b>19</b> | <b>0.0200</b>    |
| Fever Temp             | 0.7363        | 1000         | 19        | 0.5400           |
| Intubated              | 1.0596        | 1000         | 19        | 0.1160           |
| Mechanical ventilation | 0.5595        | 1000         | 19        | 0.5940           |

Supremum Test for proportional hazard assumption. Any  $p < 0.05$  was statistically significant.

**Table S8.** Assessment of the Proportional Hazards Assumptions for labs (continuous) form

| Variable                         | Max Abs Value | Replications | Seed | P-Value |
|----------------------------------|---------------|--------------|------|---------|
| White Blood Cells                | 0.7495        | 1000         | 19   | 0.1300  |
| Abs. neutrophil count            | 0.9530        | 1000         | 19   | 0.2840  |
| Abs. lymphocyte count            | 0.9140        | 1000         | 19   | 0.2870  |
| Abs. Neutrophil/Lymphocyte Ratio | 0.8075        | 1000         | 19   | 0.3350  |
| Platelets                        | 0.8027        | 1000         | 19   | 0.4820  |
| HGB                              | 1.0019        | 1000         | 19   | 0.3350  |
| LDH                              | 0.5495        | 1000         | 19   | 0.8100  |
| Ferritin                         | 0.9932        | 1000         | 19   | 0.1850  |
| D-dimer                          | 0.4179        | 1000         | 19   | 0.8120  |
| C-reactive Protein               | 0.6009        | 1000         | 19   | 0.6370  |
| Troponin                         | 0.6315        | 1000         | 19   | 0.3740  |
| BNP                              | 0.8043        | 1000         | 19   | 0.0980  |
| Creatinine                       | 0.8413        | 1000         | 19   | 0.1350  |
| AST                              | 0.5009        | 1000         | 19   | 0.5200  |
| ALT                              | 0.4692        | 1000         | 19   | 0.6730  |
| Bilirubin                        | 0.1955        | 1000         | 19   | 0.5030  |

Supremum Test for proportional hazard assumption. Any  $p < 0.05$  was statistically significant.

**Table S9.** Assessment of the Proportional Hazards Assumptions for the inflammatory markers

| Variable          | Max Abs Value | Replications | Seed      | P-Value       |
|-------------------|---------------|--------------|-----------|---------------|
| IL-6 on Admission | 0.4438        | 1000         | 19        | 0.6970        |
| IL-6 Recent       | 0.4438        | 1000         | 19        | 0.6970        |
| CK                | 0.7009        | 1000         | 19        | 0.1930        |
| La                | 0.8184        | 1000         | 19        | 0.3190        |
| Potassium         | 0.8724        | 1000         | 19        | 0.2810        |
| Magnesium         | 0.6025        | 1000         | 19        | 0.5370        |
| Phosphate         | 0.4909        | 1000         | 19        | 0.3360        |
| <b>Calcium</b>    | <b>1.3128</b> | <b>1000</b>  | <b>19</b> | <b>0.0360</b> |
| Sodium            | 0.3766        | 1000         | 19        | 0.8310        |
| BUN               | 0.4980        | 1000         | 19        | 0.5620        |
| HCT               | 0.7023        | 1000         | 19        | 0.6600        |
| Glucose           | 0.4796        | 1000         | 19        | 0.5520        |
| Total bilirubin   | 0.3156        | 1000         | 19        | 0.7450        |

Supremum Test for proportional hazard assumption. Any  $p < 0.05$  was statistically significant.

**Table S10.** Assessment of the Proportional Hazards Assumptions for the vitals

| Variable                      | Max Abs Value | Replications | Seed      | P-Value       |
|-------------------------------|---------------|--------------|-----------|---------------|
| Initial temperature           | 0.5519        | 1000         | 19        | 0.7350        |
| Initial Heart rate            | 0.3960        | 1000         | 19        | 0.9890        |
| Initial BP (Systolic)         | 0.7093        | 1000         | 19        | 0.6500        |
| <b>Initial BP (diastolic)</b> | <b>1.4722</b> | <b>1000</b>  | <b>19</b> | <b>0.0330</b> |
| Mean arterial pressure        | 1.2078        | 1000         | 19        | 0.1220        |
| Initial Respiratory Rate      | 0.4505        | 1000         | 19        | 0.5730        |
| Height (cm)                   | 0.5232        | 1000         | 19        | 0.7760        |
| Weight(kg)                    | 0.9904        | 1000         | 19        | 0.1310        |
| BMI kg/m <sup>2</sup>         | 1.0447        | 1000         | 19        | 0.1000        |
| Diagnosis age years           | 1.3620        | 1000         | 19        | 0.0500        |

Supremum Test for proportional hazard assumption. Any  $p < 0.05$  was statistically significant.

**Table S11.** Univariate\* Cox Regression Analysis of In-hospital Mortality in COVID-19 Patients

\* univariate associations were reported for covariate that satisfied the proportional hazard assumption with since admission to COVID-19 hospitalization. Variables which demonstrated that the NPH assumption was violated were adjusted by inclusion of an interaction of FiO<sub>2</sub> and time, and FiO<sub>2</sub> in the model.

| Comparison Effect                                  | HR (95% CI)              | P-Value          |
|----------------------------------------------------|--------------------------|------------------|
| Male vs Female                                     | 1.20 (0.93, 1.56)        | 0.1691           |
| <b>Age&gt;60 vs &lt;60</b>                         | <b>2.83 (2.05, 3.91)</b> | <b>&lt;.0001</b> |
| Current vs Non-Smoker                              | 0.62(0.29, 1.32)         | 0.2154           |
| Former vs Current Smoker                           | 1.21(0.91, 1.61)         | 0.1934           |
| <b>Unknown Race vs Asian</b>                       | <b>2.08(1.11, 3.89)</b>  | <b>0.0224</b>    |
| Black vs Asian                                     | 1.00(0.56, 1.79)         | 0.9926           |
| Other Race vs Asian                                | 1.12(0.65, 1.91)         | 0.6887           |
| White vs Asian                                     | 1.33(0.81, 2.20)         | 0.2651           |
| Academic vs Community Hospital                     | 1.18 (0.91, 1.52)        | 0.2105           |
| <b>Nursing Home vs Home</b>                        | <b>2.81(1.99, 3.96)</b>  | <b>&lt;.0001</b> |
| <i>Symptoms</i>                                    |                          |                  |
| Fever vs None                                      | 0.88 (0.67, 1.15)        | 0.3445           |
| SOB vs None                                        | 1.18 (0.91, 1.53)        | 0.2233           |
| Cough vs None                                      | 0.79 (0.61, 1.01)        | 0.0641           |
| <b>AMS vs None</b>                                 | <b>3.14(2.32, 4.26)</b>  | <b>&lt;.0001</b> |
| <b>GI vs None</b>                                  | <b>0.66(0.47, 0.93)</b>  | <b>0.0185</b>    |
| <b>Anosmia or Ageusia vs None</b>                  | NA                       | <b>&lt;.0001</b> |
| <b>Duration of Symptoms PTA &gt; 7 vs ≤ 7 days</b> | <b>0.61 (0.41, 0.91)</b> | <b>0.0143</b>    |
| Diabetes vs None                                   | 1.06 (0.82, 1.37)        | 0.6503           |
| <b>COPD vs None</b>                                | <b>2.44 (1.64, 3.63)</b> | <b>&lt;.0001</b> |
| Asthma vs None                                     | 0.89 (0.56,1.41)         | 0.6042           |
| <b>COPD/Asthma vs None</b>                         | <b>1.49(1.07, 2.05)</b>  | <b>0.0169</b>    |
| <b>Hypertension vs None</b>                        | <b>2.12 (1.60, 2.81)</b> | <b>&lt;.0001</b> |
| <b>Cancer vs None</b>                              | <b>2.08 (1.46, 2.97)</b> | <b>&lt;.0001</b> |
| <b>CAD vs None</b>                                 | <b>2.09 (1.56, 2.79)</b> | <b>&lt;.0001</b> |
| <b>CVA vs None</b>                                 | <b>2.24 (1.44, 3.50)</b> | <b>0.0004</b>    |
| <b>CHF vs None</b>                                 | <b>2.12 (1.41, 3.21)</b> | <b>0.0004</b>    |
| <b>Arrhythmia vs None</b>                          | <b>2.07 (1.43, 2.98)</b> | <b>0.0001</b>    |
| <b>Renal Failure vs None</b>                       | <b>1.95 (1.37, 2.78)</b> | <b>0.0002</b>    |
| Dialysis vs None                                   | 0.74 (0.39, 1.43)        | 0.3726           |
| <i>Presentations Characteristics</i>               |                          |                  |
| Elevated LFTS vs None                              | 1.03 (0.80, 1.33)        | 0.8142           |
| Low Oxygen Saturation vs None                      | 0.99 (0.77, 1.28)        | 0.9307           |
| <b>Mechanical Ventilation vs None</b>              | <b>1.62 (1.16, 2.27)</b> | <b>0.0051</b>    |
| Non-Mechanical Ventilation Oxygen Support Vs None  | 0.98 (0.64, 1.50)        | 0.9233           |
| qSOFA 3 vs 0                                       | 10.23 (5.00, 20.96)      | <.0001           |
| <b>qSOFA 2 vs 0</b>                                | <b>3.64 (2.41, 5.50)</b> | <b>&lt;.0001</b> |

| Comparison Effect                             | HR (95% CI)              | P-Value          |
|-----------------------------------------------|--------------------------|------------------|
| <b>qSOFA 1 vs 0</b>                           | <b>1.42 (1.07, 1.90)</b> | <b>0.0169</b>    |
| <b>Hydroxychloroquine vs None</b>             | <b>0.41 (0.30, 0.56)</b> | <b>&lt;.0001</b> |
| <b>Azithromycin vs None</b>                   | <b>0.64 (0.49, 0.84)</b> | <b>0.0012</b>    |
| HCQ and Az vs None                            | 0.89 (0.19, 4.26)        | 0.8860           |
| Remdesivir vs None                            | 0.78 (0.34, 1.81)        | 0.5637           |
| <b>Tocilizumab vs None</b>                    | <b>0.68 (0.47, 0.98)</b> | <b>0.0407</b>    |
| Convalescent Plasma vs None                   | 0.23 (0.03, 1.74)        | 0.1558           |
| <b>Methylprednisolone</b>                     |                          |                  |
| <i>Dose</i>                                   |                          |                  |
| <b>MP vs NMP</b>                              | <b>0.44 (0.33, 0.60)</b> | <b>&lt;.0001</b> |
| <b>HD MP vs NMP</b>                           | <b>0.61 (0.44, 0.85)</b> | <b>0.0033</b>    |
| <b>LD MP vs NMP</b>                           | <b>0.34 (0.24, 0.48)</b> | <b>&lt;.0001</b> |
| <i>Level of Oxygen Support Vs MP Dose</i>     |                          |                  |
| No oxygen support in HD MP vs NMP             | 0.96 (0.49, 1.86)        | 0.8940           |
| No oxygen support in LD MP vs NMP             | 0.25 (0.10, 0.62)        | <b>0.0028</b>    |
| Oxygen support in HD MP vs NMP                | 0.50 (0.24, 1.06)        | 0.0701           |
| Oxygen support in LD MP vs NMP                | 0.08 (0.02, 0.28)        | <b>&lt;.0001</b> |
| Mechanical Ventilation in HD MP vs NMP        | 0.39 (0.23, 0.65)        | <b>0.0003</b>    |
| <b>Mechanical Ventilation in LD MP vs NMP</b> | <b>0.34 (0.20, 0.57)</b> | <b>&lt;.0001</b> |
| <i>Duration</i>                               |                          |                  |
| <b>MP ≤ 7 vs &gt; 7 days</b>                  | <b>1.86 (1.36, 2.56)</b> | <b>&lt;.0001</b> |
| <b>HD MP ≤ 7 vs &gt; 7 days</b>               | <b>2.00 (1.25, 3.20)</b> | <b>0.0039</b>    |
| <b>HD vs LD MP ≤ 7 days</b>                   | <b>1.73 (1.11, 2.70)</b> | <b>0.0157</b>    |
| <b>HD MP ≤ 7 days vs LD MP &gt; 7 days</b>    | <b>4.01 (2.45, 6.57)</b> | <b>&lt;.0001</b> |
| HD MP ≤ 7 days vs NMP                         | 0.82 (0.55, 1.20)        | 0.3095           |
| HD MP > 7 days vs LD MP ≤ 7 days              | 0.87 (0.55, 1.35)        | 0.5364           |
| <b>HD MP &gt; 7 days vs LD MP &gt; 7 days</b> | <b>2.01 (1.22, 3.30)</b> | <b>0.0061</b>    |
| <b>HD MP &gt; 7 days vs NMP</b>               | <b>0.41 (0.26, 0.62)</b> | <b>&lt;.0001</b> |
| <b>LD MP ≤ 7 vs &gt; 7 days</b>               | <b>2.32 (1.43, 3.75)</b> | <b>0.0006</b>    |
| <b>LD MP ≤ 7 days vs NMP</b>                  | <b>0.47 (0.32, 0.71)</b> | <b>0.0002</b>    |
| <b>LD MP &gt; 7 days vs NMP</b>               | <b>0.20 (0.13, 0.32)</b> | <b>&lt;.0001</b> |
| <i>Timing from Onset of Symptoms</i>          |                          |                  |
| <b>&gt;7-14 days vs ≤ 7 days</b>              | <b>0.70 (0.49, 0.99)</b> | <b>0.0462</b>    |
| <b>&gt;14 days vs ≤ 7 days</b>                | <b>0.32 (0.16, 0.63)</b> | <b>0.0010</b>    |

HR = Hazard Ratio; CI = Confidence Interval; SOB = Shortness of Breath; AMS = Altered Mental Status; GI = Gastrointestinal Symptoms; PTA = Prior to admission; COPD = Chronic Obstructive Disease; CAD = Coronary Artery Disease; CVA = Cerebrovascular Accident; CHF = Congestive Heart Failure; LFTs = elevated liver function tests; SOFA = Sequential Organ Failure Assessment; HCQ = Hydroxychloroquine; AZ = Azithromycin; MP = Methylprednisolone; HD MP = High Dose Methylprednisolone; LD MP = Low Dose Methylprednisolone

**Table S12.** Multivariable Risk of In-hospital mortality in COVID-19 patients with/without methylprednisolone *Model 1* included interaction of FiO<sub>2</sub> and time to adjust for interaction between time and risk factors including methylprednisolone, nursing home, coronary artery disease, supplemental oxygen in mechanical ventilation form vs none, supplemental oxygen in non-mechanical ventilation form vs none, hydroxychloroquine, and azithromycin.

| Variable                       | Category                               | HR (95% CI)              | P-Value          |
|--------------------------------|----------------------------------------|--------------------------|------------------|
| <b>Methylprednisolone</b>      | <b>Methylprednisolone vs None</b>      | <b>0.40 (0.27, 0.59)</b> | <b>&lt;.0001</b> |
| <b>Nursing home</b>            | <b>Yes vs. No</b>                      | <b>3.08 (1.94, 4.89)</b> | <b>&lt;.0001</b> |
| <b>Coronary Artery Disease</b> | <b>Yes vs. No</b>                      | <b>2.12 (1.38, 3.27)</b> | <b>0.0006</b>    |
| <b>Supplemental Oxygen</b>     | <b>Mechanical-Ventilation vs. None</b> | <b>2.87 (1.64, 5.02)</b> | <b>0.0002</b>    |
| Supplemental Oxygen            | Non-mechanical Ventilation vs. None    | 1.11 (0.60, 2.05)        | 0.7483           |
| Hydroxychloroquine             | Yes vs. No                             | 0.67 (0.43,1.02)         | 0.0644           |
| <b>Azithromycin</b>            | <b>Yes vs. No</b>                      | <b>0.64 (0.44, 0.93)</b> | <b>0.0183</b>    |

HR, Hazard Ratio; CI, confidence interval

Risk of in-hospital mortality by nonproportional hazard (NPH)

Cox Regression model. Any p<0.05 was statistically significant.



**Table S13.** Multivariable Risk of In-hospital mortality in COVID-19 patients with HD, LD and No methylprednisolone. *Model 2* included interaction of FiO2 and time to adjust for interaction between time and risk factors including methylprednisolone dose {High Dose(HD),Low Dose (LD), None}, nursing home, coronary artery disease, supplemental oxygen in mechanical ventilation form vs none, supplemental oxygen in non-mechanical ventilation form vs none, hydroxychloroquine, and azithromycin.

| Variable                       | Category                               | HR (95% CI)              | P-Value          |
|--------------------------------|----------------------------------------|--------------------------|------------------|
| <b>Methylprednisolone Dose</b> | <b>HD Methylprednisolone vs. None</b>  | <b>0.48 (0.30, 0.77)</b> | <b>0.0025</b>    |
| <b>Methylprednisolone Dose</b> | <b>LD Methylprednisolone vs. None</b>  | <b>0.35 (0.22, 0.53)</b> | <b>&lt;.0001</b> |
| <b>Nursing home</b>            | <b>Yes vs. No</b>                      | <b>2.95 (1.83, 4.76)</b> | <b>&lt;.0001</b> |
| <b>Coronary Artery Disease</b> | <b>Yes vs. No</b>                      | <b>2.22 (1.44, 3.42)</b> | <b>0.0003</b>    |
| <b>Supplemental Oxygen</b>     | <b>Mechanical-Ventilation vs. None</b> | <b>2.77(1.58, 4.86)</b>  | <b>0.0004</b>    |
| Supplemental Oxygen            | Non-mechanical Ventilation vs. None    | 1.13 (0.61, 2.09)        | 0.6992           |
| Hydroxychloroquine             | Yes vs. No                             | 0.67 (0.44,1.02)         | 0.0642           |
| <b>Azithromycin</b>            | <b>Yes vs. No</b>                      | <b>0.66 (0.45, 0.95)</b> | <b>0.0262</b>    |

HR, Hazard Ratio; CI, confidence interval. Risk of in-hospital mortality by nonproportional hazard (NPH) Cox Regression model. Any p<0.05 was statistically significant.

**Figure S16.** Boxplots of fraction of inspired oxygen ( $\text{FiO}_2$ ) reported on admission in COVID-19 patients who were not treated with methylprednisolone and COVID-19 patients who received methylprednisolone. In each boxplot, the horizontal line in the middle indicates the median, the bottom edge of the box is the 25<sup>th</sup> percentile and the top edge of the box is the 75<sup>th</sup> percentile of  $\text{FiO}_2$ . The lower endpoints of the whiskers on each side of the box indicate the minimum and maximum value. The patients who did not receive methylprednisolone reported median  $\text{FiO}_2$  value of 28% (IQR: 21%- 36%) with a range of 20% to 100% from 368 of the 383 patients. The patients who received methylprednisolone reported median  $\text{FiO}_2$  value of 36% (IQR: 23% - 100%) with a range of 15% to 100% from 354 of the 380 patients. Analysis of  $\text{FiO}_2$  differences between matched patients indicated the median of 4.0% (IQR 0% to 35%) MP vs NMP was statistically significant (Wilcoxon signed rank test  $P < .0001$ ).

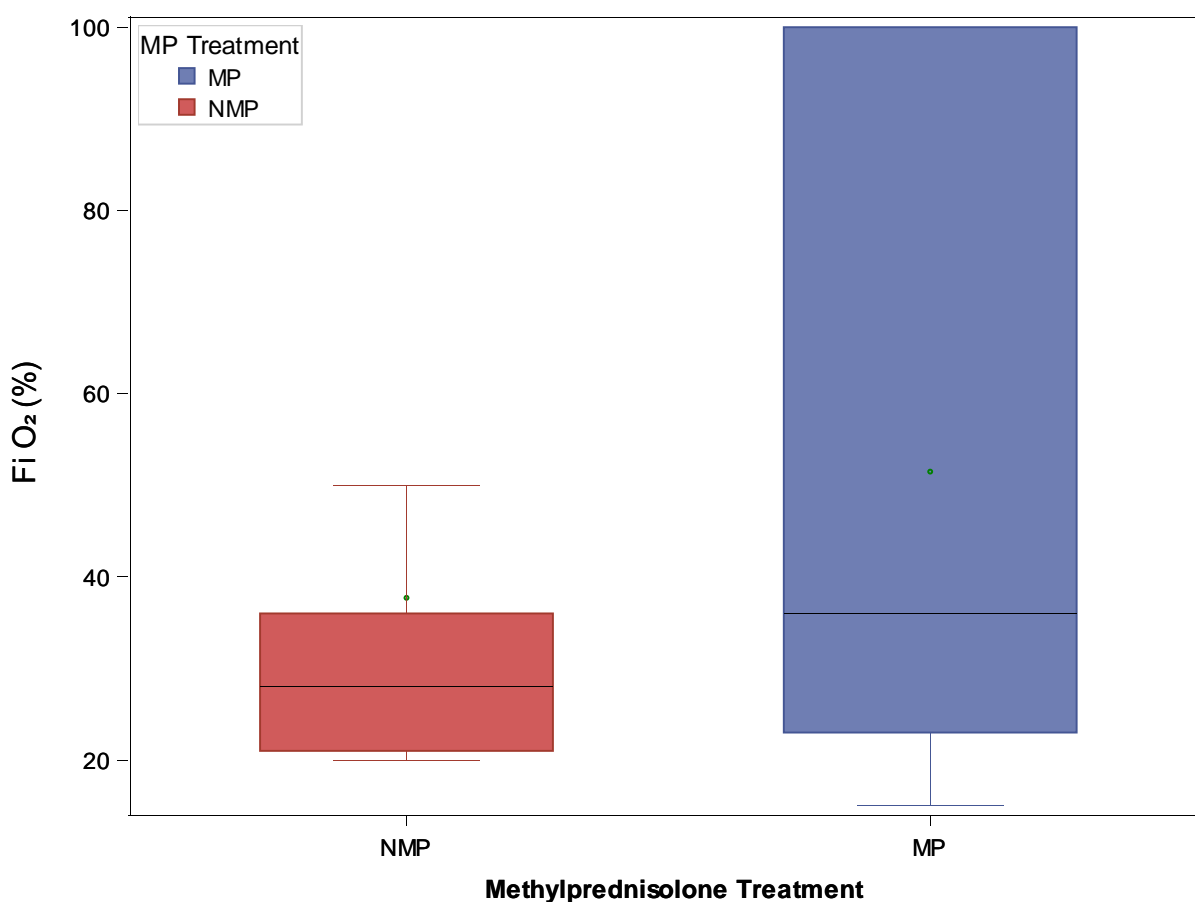

**Figure S17.** Boxplots of fraction of inspired oxygen (FiO<sub>2</sub>) reported on admission in COVID-19 patients who were not treated with methylprednisolone (NMP) and COVID-19 patients who received LD methylprednisolone (LD MP) and HD methylprednisolone (HD MP). LD MP was defined as < 1.36 mg/kg/day and HD MP was defined as ≥ 1.36 mg/kg/day. In each boxplot, the horizontal line in the middle indicates the median, the bottom edge of the box is the 25<sup>th</sup> percentile and the top edge of the box is the 75<sup>th</sup> percentile of FiO<sub>2</sub>. The lower endpoints of the whiskers on each side of the box indicate the minimum and maximum value. The patients who did not receive methylprednisolone reported median FiO<sub>2</sub> value of 28% (IQR: 21%- 36%) with a range of 20% to 100% from 368 of the 383 patients. The patients who received LD MP reported median FiO<sub>2</sub> value of 36% (IQR: 21% - 100%) with a range of 15% to 100% from 203 of the 380 patients. The patients who received HD MP reported median FiO<sub>2</sub> value of 32% (IQR: 28% - 80%) with a range of 21% to 100% from 151 of the 380 patients. Analysis of FiO<sub>2</sub> differences between matched patients indicated the median of 4.0% (IQR 0% to 64%) LD MP vs NMP was statistically significant (Wilcoxon signed rank test P<.0001). Analysis of FiO<sub>2</sub> differences between matched patients indicated the median of 7.0% (IQR 0% to 19%) HD MP vs NMP was statistically significant (Wilcoxon signed rank test P<.0001).

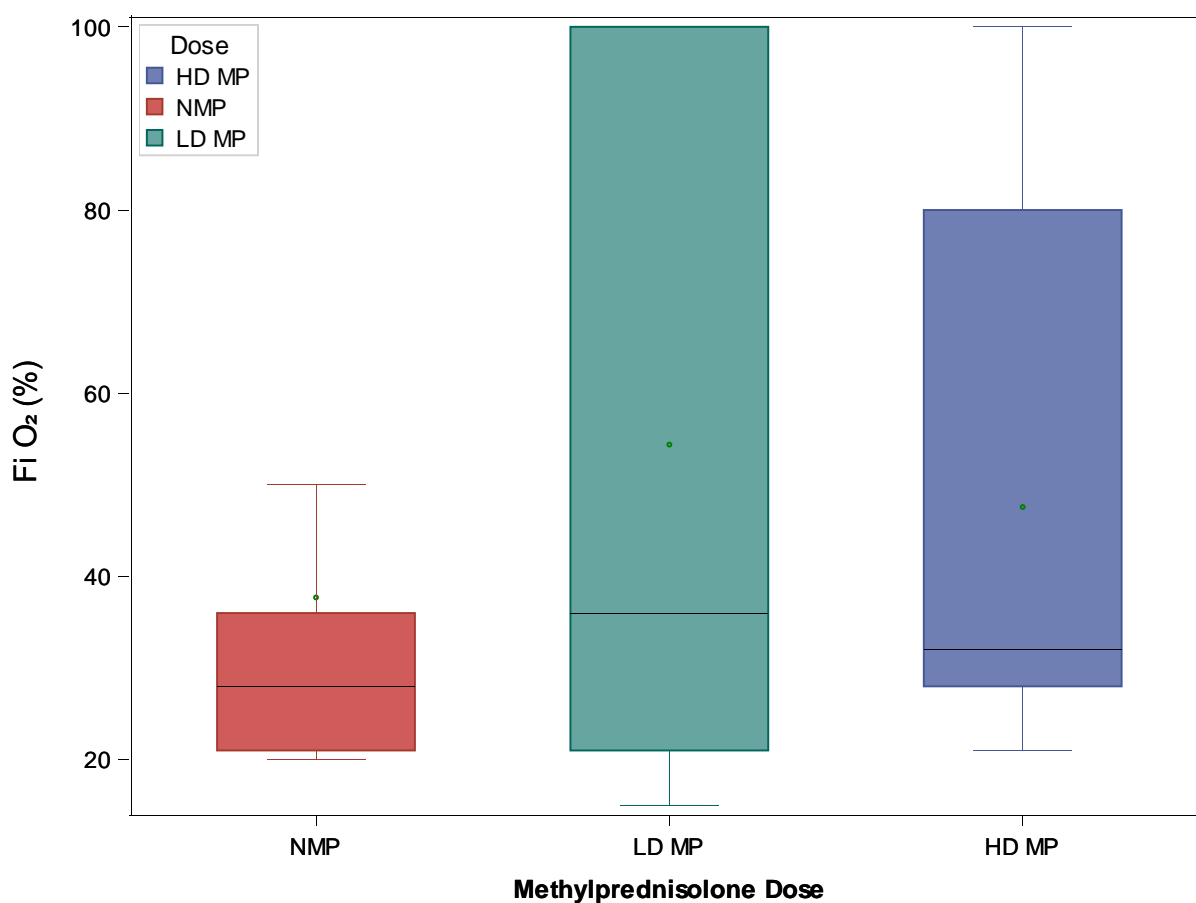

**Figure S18.** Boxplot of Total Dose/Absolute Body Weight/Day in hospitalized COVID-19 patients who received Methylprednisolone (N=380). In the box plot above, the horizontal line in the middle indicates the median, the bottom edge of the box is the 25th percentile and the top edge of the box is the 75th percentile of Total Dose/ABW/Day. The lower endpoints of the whiskers on each side of the box indicate the minimum and maximum value. The green dashed line at Total Dose/ABW/Day of 1.36 depicts the cut-off value that was determined by the Youden Index Method. The total dose/ABW/day in the all methylprednisolone treated patients had a median of 1.25 mg/kg/day (IQR: 0.93 – 1.72 mg/kg/day), range 0.27 – 7.98 mg/kg/day. The cut-off value of total dose/ABW/day of 1.36 mg/kg/day against the mortality event had an area under ROC curve of 56.8% (95% CI 51.7% to 62.0%), which is not very high. Further the cut-off value had a sensitivity of 51.8% and specificity of 62.0% in determining patients who are at higher risk for in-hospitality mortality than lower risk. Thus, while this cutoff value should not be used as a reference level since administration of methylprednisolone moderate-severe COVID-19 was not employed as the main therapy in an clinically designed trial, but rescue therapy, it provides us with a measure of predictive capability that underpinned its prescription during new pandemic.

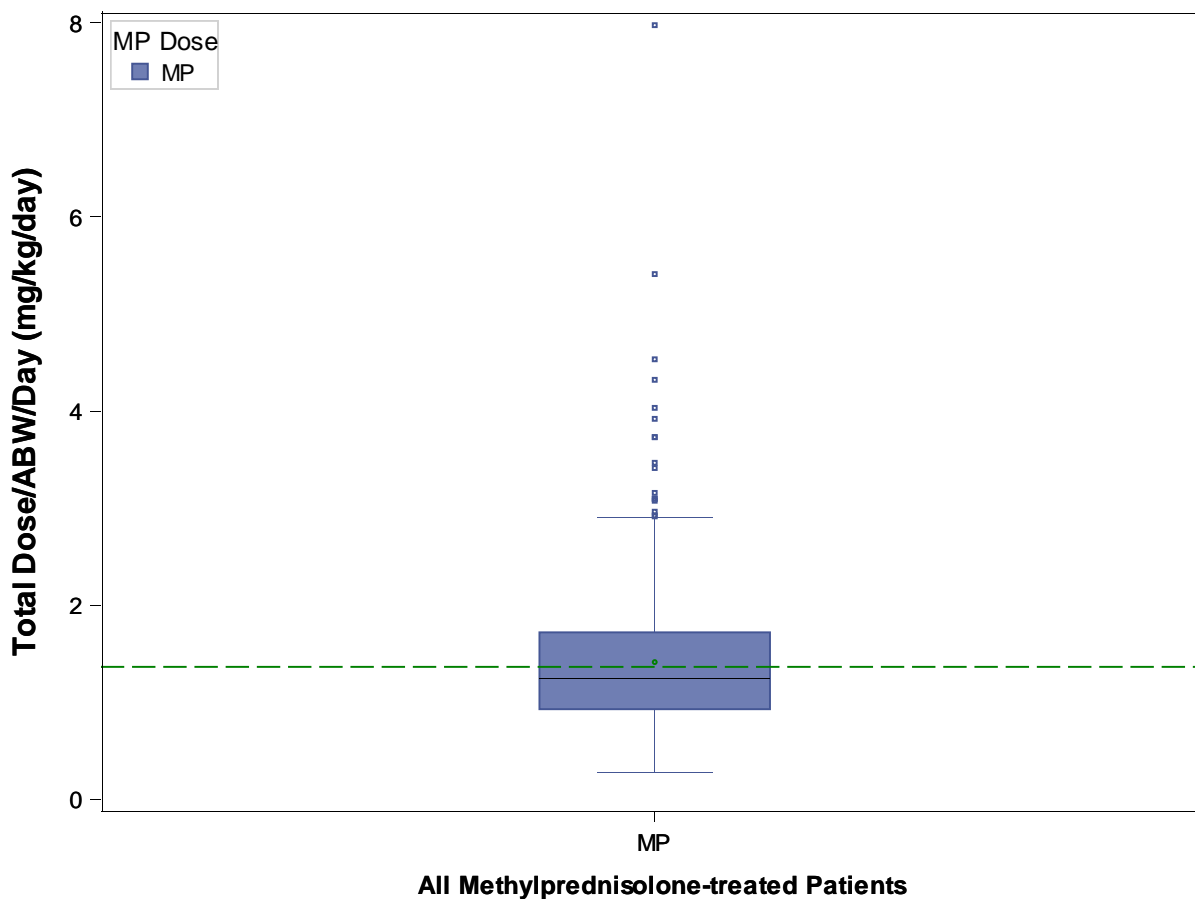

**Figure S19.** Boxplot of Total Dose/Absolute Body Weight/Day in hospitalized COVID-19 patients who received LD Methylprednisolone (N=216) and HD Methylprednisolone (N=164). In each boxplot, the horizontal line in the middle indicates the median, the bottom edge of the box is the 25th percentile and the top edge of the box is the 75th percentile of Total Dose/ABW/Day. The lower endpoints of the whiskers on each side of the box indicate the minimum and maximum value. The green dashed line at Total Dose/ABW/Day of 1.36 depicts the cut-off value that was determined by the Youden Index Method. The total dose/ABW/day in the LD methylprednisolone treated patients had a median of 0.98 mg/kg/day (IQR: 0.82 – 1.10 mg/kg/day), range 0.27 – 1.36 mg/kg/day. The total dose/ABW/day in the HD methylprednisolone treated patients had a median of 1.79 mg/kg/day (IQR: 1.55 – 2.14 mg/kg/day), range 1.37 – 7.98 mg/kg/day.

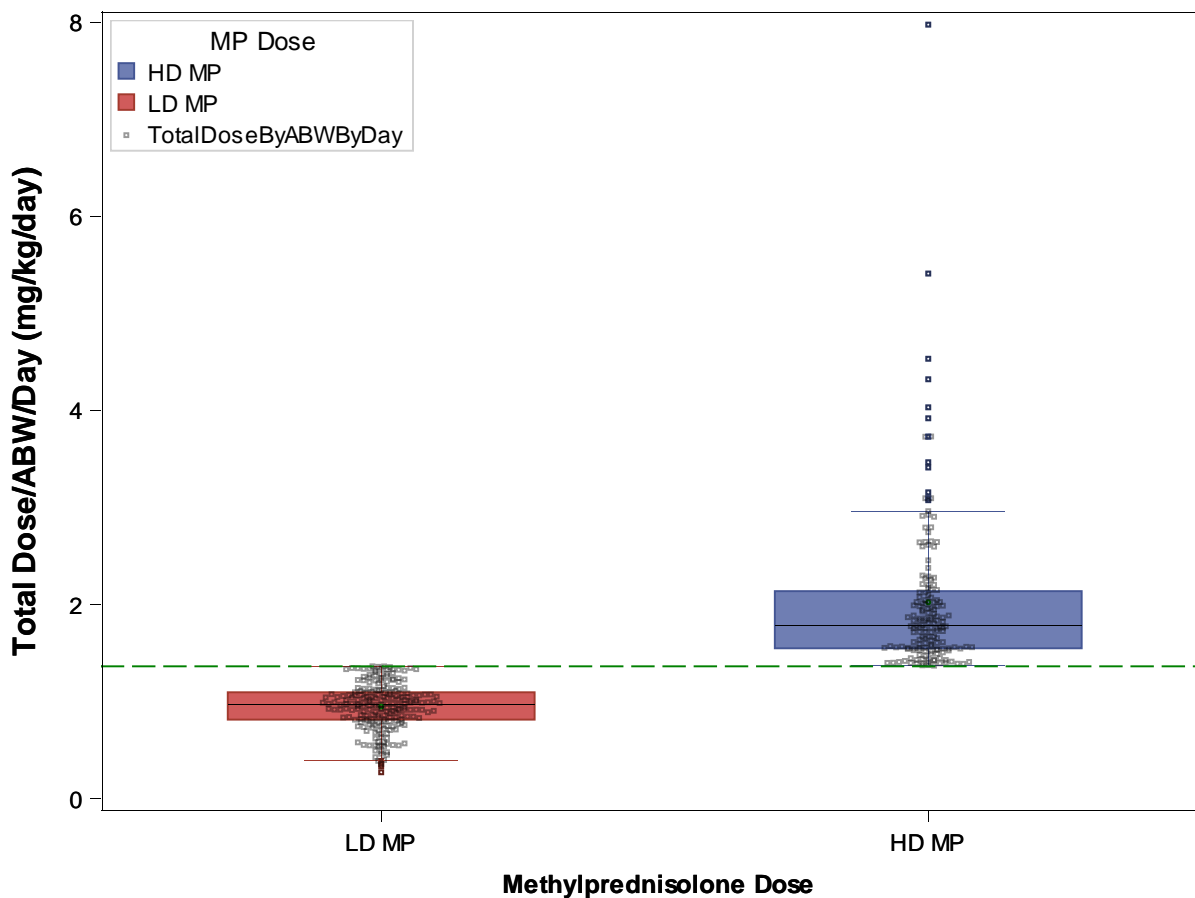

**Figure S20.** Kaplan-Meier Plot of in-hospital survival for low dose methylprednisolone (LD MP) and high dose methylprednisolone (HD MP) treated cohorts in admitted COVID-19 patients. Out of the 215 patients in the LD MP cohort, 69 (31.9%) expired during COVID-19 hospital stay. Out of the 164 patients in the HD MP cohort, 74 (55.2%) expired during COVID-19 hospital stay. 30-Day and 60-Day In-hospital survival for the LD MP cohort were 54.2% (95% CI 44.8% to 63.5%) and 19.1% (95% CI 1.1% to 51.4%), respectively. 30-Day and 60-Day In-hospital survival for the HD MP cohort were 29.6% (95% CI 19.8% to 40.4%) and 14.4% (95% CI 5.0% to 27.9%), respectively. The difference in In-hospital survival between the NMP (median=25.0 days (95% CI 22.0 to 32.0 days)] and LD MP (median =39.0 days (95% CI 27.0 to N/A days)] and HD MP (median =20.0 days (95% CI 17.0 to 24 days)] was statistically significant (Log-rank P=0.0011). These data indicate there was survival benefit for the patients that were treated with LD MP throughout the Day 60 follow-up compared to the HD MP.

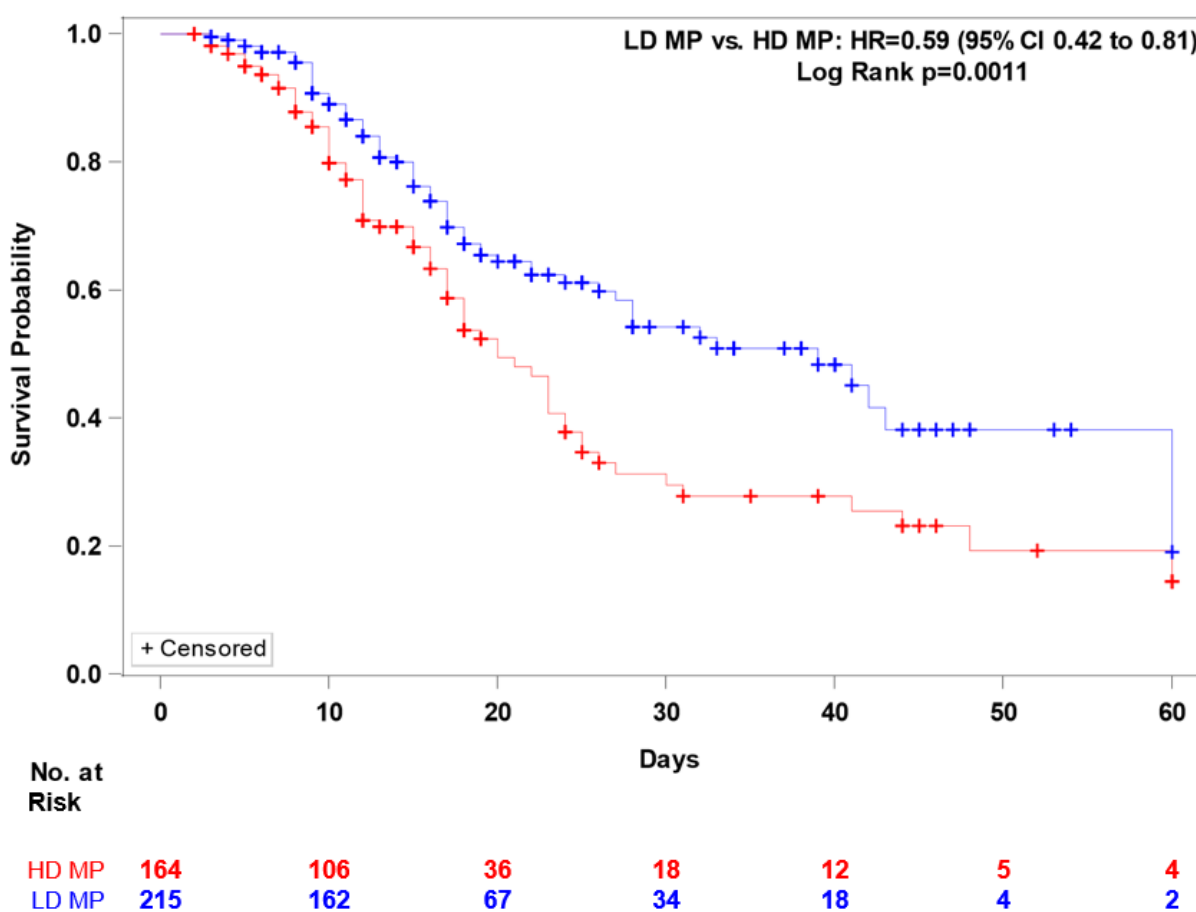

**Figure S21.** Kaplan-Meier Plot of in-hospital survival for admitted COVID-19 patients whose duration on methylprednisolone (MP) was  $\leq 7$  days, between 7 and 14 days and  $> 7$  days. Out of the 247 patients on MP treatment for  $\leq 7$  days the LD MP cohort, 89 (35.0%) expired during COVID-19 hospital stay. Out of the 91 patients on MP treatment between 7 and 14 days, 36 (39.5%) expired during COVID-19 hospital stay. Out of the 41 patients on MP treatment for 14 days, 18 (44.0%) expired during COVID-19 hospital stay. 30-Day and 60-Day In-hospital survival for MP Dose  $\leq 7$  days cohort were 32.2% (95% CI 22.3% to 42.9%) and 29.9% (95% CI 20.0% to 40.9%), respectively. 30-Day and 60-Day In-hospital survival for the MP Dose 7-14 days cohort were 48.1% (95% CI 35.0% to 61.3%) and 38.5% (95% CI 23.4% to 55.0%), respectively. 30-Day and 60-Day In-hospital survival for the MP Dose  $> 14$  days cohort were 71.7% (95% CI 54.9% to 85.9%) and 36.6% (95% CI 16.4% to 59.7%), respectively. The difference in In-hospital survival between the MP Dose  $\leq 7$  days (median=19.0 days (95% CI 17.0 to 23.0 days)] , MP Dose 7-14 days (median =30.0 days (95% CI 19.0 to N/A days)] and MP Dose  $> 14$  days (median =44.0 days (95% CI 32.0 to 60 days)] was statistically significant (Log-rank  $P=0.0011$ ). These data indicate there was survival benefit for the patients that were treated with MP for  $> 14$  days and between 7 and 14 day throughout the Day 60 follow-up compared to patients treated for less than 7 days.

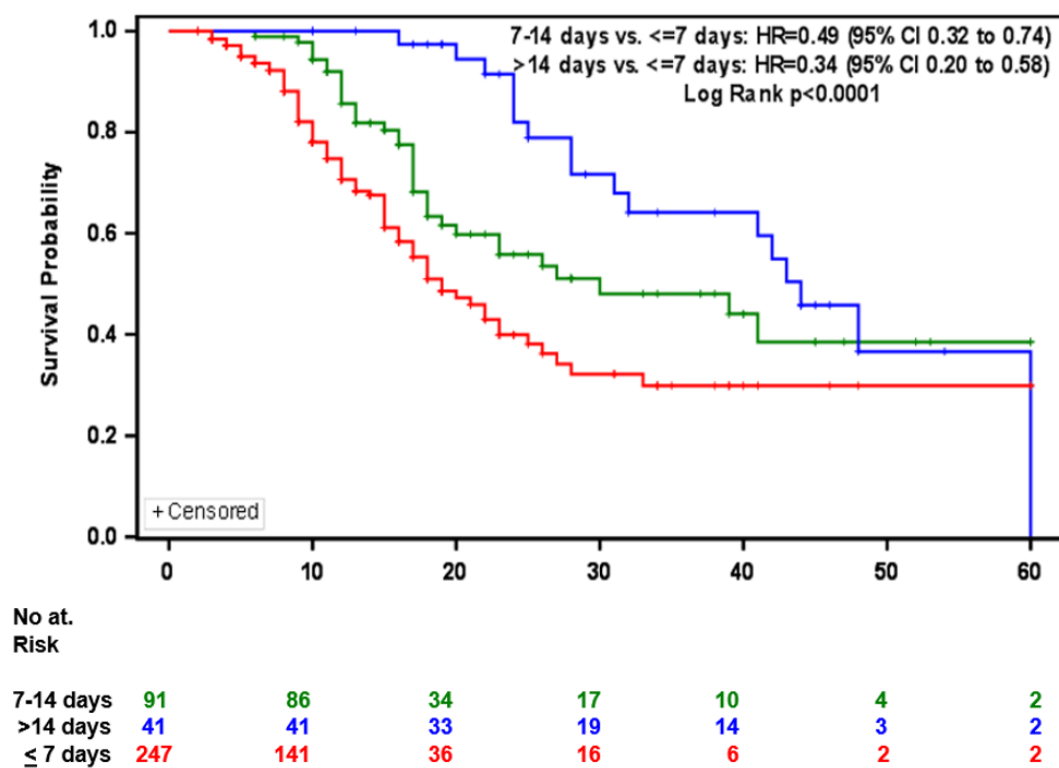

**Figure S22.** Kaplan-Meier Plot of in-hospital survival for admitted COVID-19 patients duration since onset of symptoms to initiation of methylprednisolone (MP) dose that was  $\leq 7$  days, between 7 and 14 days and  $>7$  days. Out of the 181 patients who had MP treatment started within  $\leq 7$  days of onset of symptoms, 86 (47.3%) expired during COVID-19 hospital stay. Out of the 41 patients who had MP treatment started between 7 and 14 days since onset of symptoms, 9 (22.0%) expired during COVID-19 hospital stay. Out of the 153 patients who had MP treatment started after 14 days since onset of symptoms, 48 (31.4%) expired during COVID-19 hospital stay. 30-Day and 60-Day In-hospital survival for the MP dose initiation  $\leq 7$  days since onset of symptoms cohort were 36.8% (95% CI 27.4% to 46.6%) and 14.8% (95% CI 3.8% to 31.1%), respectively. 30-Day and 60-Day In-hospital survival for the MP dose initiation between 7-14 days since onset of symptoms cohort were 41.4% (95% CI 28.9% to 54.6%) and 0, respectively. 30-Day and 60-Day In-hospital survival for the MP dose initiation after 7 days since onset of symptoms cohort were 71.6% (95% CI 53.2% to 86.8%) and 65.1% (95% CI 44.5% to 83.0%), respectively. The difference in In-hospital survival between the symptom duration  $\leq 7$  days (median=20.0 days (95% CI 17.0 to 26.0 days) , symptom duration 7-14 days (median =27.0 days (95% CI 23.0 to 42 days) and symptom duration  $>14$  days N/A was statistically significant (Log-rank  $P=0.0008$ ). These data indicate there was survival benefit for the patients who MP treatment was started  $>14$  days and between 7 and 14 day since the onset of symptoms compared to patients with MP initiation within 7 days of onset of symptoms.

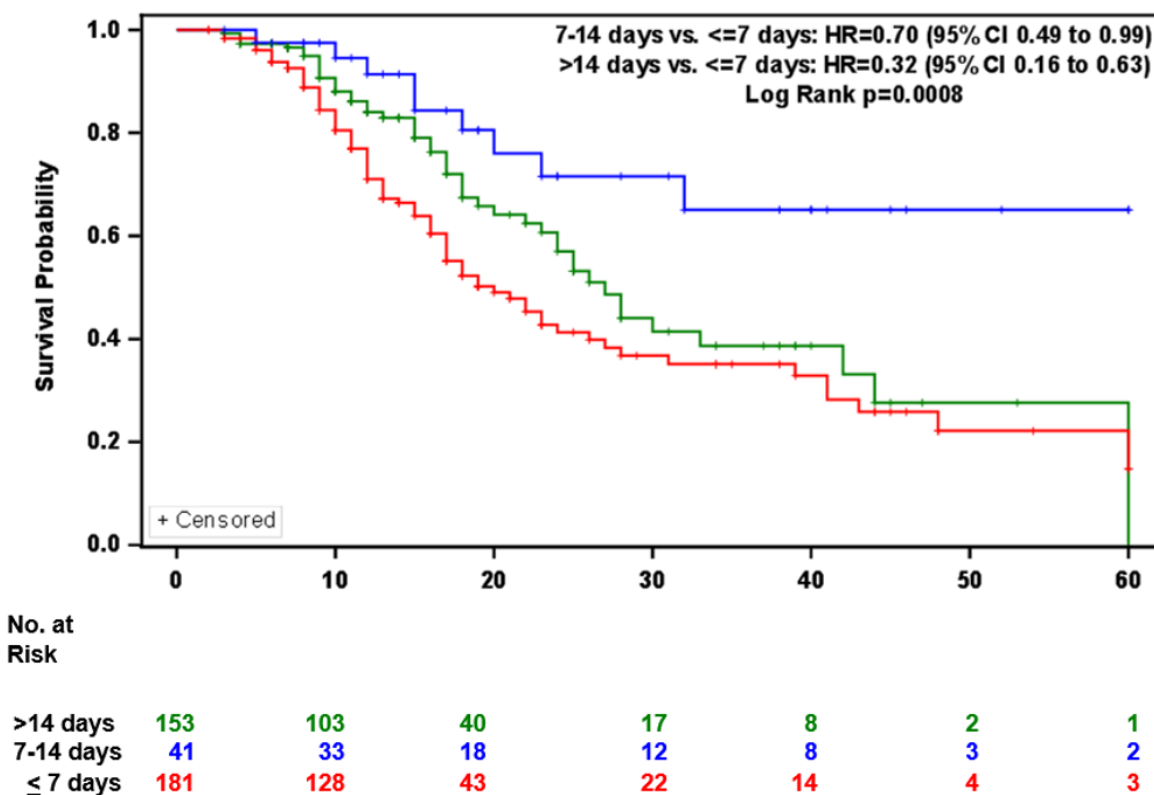



**Table S14.** Need for Supplemental Oxygen versus Methylprednisolone Dose Duration (n=379)

| <i>&lt; 7 -Day Duration(n=247)</i>    | Methylprednisolone Dose Duration |           |         |
|---------------------------------------|----------------------------------|-----------|---------|
|                                       | LD MP                            | HD MP     | P-value |
| Supplemental Oxygen                   |                                  |           |         |
| None                                  | 41 (29.4)                        | 35 (32.4) |         |
| Non-Mechanical Ventilation            | 49 (35.3)                        | 29 (26.9) | 0.3705  |
| Mechanical Ventilation                | 49 (35.3)                        | 44 (40.7) |         |
| <i>&lt; 7-14 -Day Duration (n=91)</i> |                                  |           |         |
| None                                  | 12 (22.6)                        | 10 (26.3) |         |
| Non-Mechanical Ventilation            | 12 (22.6)                        | 5 (13.2)  | 0.5212  |
| Mechanical Ventilation                | 29 (54.7)                        | 23 (60.5) |         |
| <i>&gt; 14 -Day Duration (n=41)</i>   |                                  |           |         |
| None                                  | 2 (8.7)                          | 2 (11.1)  |         |
| Non-Mechanical Ventilation            | 5 (21.7)                         | 1 (5.6)   | 0.3241  |
| Mechanical Ventilation                | 16 (69.6)                        | 15 (83.3) |         |
